# Supplementary material
Source: HighWire-hosted journal article supplement (https://bmjopen.bmj.com/content/15/2/e082853)
Supplement: inline-supplementary-material-1 [file inline-supplementary-material-1.pdf]

## Supplementary material

**The beneficial and harmful effects of duloxetine versus placebo for adults with major depressive disorder: A systematic review with meta-analysis and Trial Sequential Analysis of randomised clinical trials**

**Faiza Siddiqui, PhD; Johanne Juul Petersen, medical student; Sophie Juul, PhD; Caroline Kamp Jørgensen, PhD student; Marija Barbateskovic, PhD; Joanna Moncrieff, professor; Mark Horowitz, PhD; Mathias Maagaard, MD; Kiran Kumar Katakam, PhD; Christian Gluud, professor; Janus Christian Jakobsen, professor**

Contents

Search strategies for ‘Duloxetine for major depressive disorder’ ..... 4

Supplementary table S2: Summary of serious adverse events in the included trials..... 7

Supplementary Table S3: Meta-analysis of individual non-serious adverse events..... 9

Supplementary Fig S1: PRISMA flow chart. .... 10

Supplementary Fig S2: Meta-analysis of duloxetine vs. placebo for the outcome HDRS-17 scores..... 11

Supplementary Fig S3: Trial Sequential Analysis of duloxetine vs. placebo for the outcome HDRS-17. .... 12

Supplementary Fig S4: Funnel plot of duloxetine vs. placebo for the outcome HDRS-17 scores..... 13

Supplementary Fig S5: Subgroup analysis of duloxetine vs. placebo on HDRS-17 for baseline HDRS-17 scores. .... 14

Supplementary Fig S6: Subgroup analysis of duloxetine vs. placebo on HDRS-17 for chronic or treatment resistant depression. .... 15

Supplementary Fig S7: Subgroup analysis of duloxetine vs. placebo on HDRS-17 for duloxetine dose. .... 16

Supplementary Fig S8: Subgroup analysis of placebo washout period on HDRS-17..... 17

Supplementary Fig S9: Funnel plot of duloxetine vs. placebo for the outcome serious adverse events..... 18

Supplementary Fig S10: Subgroup analysis of baseline HDRS scores on serious adverse events. .... 19

Supplementary Fig S11: Subgroup analysis of chronic treatment resistant depression on serious adverse events..... 20

Supplementary Fig S12: Subgroup analysis of participants' age on serious adverse events ..... 22

Supplementary Fig S13: Subgroup analysis of duloxetine dose on serious adverse events..... 23

Supplementary Fig S14: Subgroup analysis of placebo washout period on serious adverse events. .... 24

Supplementary Fig S15: Funnel plot duloxetine vs. placebo for the outcome suicide or suicide attempt. .... 25

Supplementary Fig S16: Subgroup analysis of baseline HDRS scores on suicide and suicide attempts. .... 26

Supplementary Fig S17: Subgroup analysis of chronic treatment resistant depression on suicide and suicide attempts. .... 27

Supplementary Fig S18: Subgroup analysis of participants' age on suicide and suicide attempts. .... 28

Supplementary Fig S 19: Subgroup analysis of placebo washout period on suicide and suicide attempts..... 29

Supplementary Fig S20: Meta-analysis of duloxetine vs. placebo on the outcome quality of life..... 30

|                                                                                                                                                |    |
|------------------------------------------------------------------------------------------------------------------------------------------------|----|
| Supplementary Fig S21: Trial Sequential Analysis of duloxetine vs. placebo for the outcome quality of life.....                                | 31 |
| Supplementary Fig S22: Subgroup analysis of duloxetine dose on quality of life. ....                                                           | 32 |
| Supplementary Fig S23: Meta-analysis of duloxetine vs. placebo on the outcome suicidal ideation. ....                                          | 33 |
| Supplementary Fig S24: Funnel plot duloxetine vs. placebo for the outcome non-serious adverse events. ....                                     | 34 |
| Supplementary Fig S25: Subgroup analysis of baseline HDRS scores on non-serious adverse events. ....                                           | 35 |
| Supplementary Fig S26: Subgroup analysis of participants' age on non-serious adverse events. ....                                              | 36 |
| Supplementary Fig S27: Subgroup analysis of duloxetine dose on non-serious adverse events.....                                                 | 37 |
| Supplementary Fig S28: Subgroup analysis of chronic treatment-resistant depression on non-serious adverse events. ....                         | 38 |
| Supplementary Fig S29: Subgroup analysis of for participants without chronic treatment resistant depression on non-serious adverse events..... | 39 |
| Supplementary Fig S30: Subgroup analysis of participants with chronic treatment resistant depression on non-serious adverse events. ....       | 40 |
| Supplementary Fig S31: Subgroup analysis of placebo washout period on non-serious adverse events.....                                          | 41 |
| Supplementary Fig S32: Subgroup analysis of trials without placebo washout period on non-serious adverse events.....                           | 42 |
| Supplementary Fig S33: Subgroup analysis of trials with placebo washout period on non-serious adverse events.....                              | 43 |
| Exploratory outcomes .....                                                                                                                     | 44 |
| Hamilton Depression Rating Scale, Montgomery-Asberg Depression Rating Scale and Beck's Depression Inventory.....                               | 44 |
| Response .....                                                                                                                                 | 44 |
| Supplementary Fig S34: Meta-analysis of duloxetine vs. placebo on the outcome response rates. ....                                             | 45 |
| Remission.....                                                                                                                                 | 46 |
| Supplementary Fig S35: Meta-analysis of duloxetine vs. placebo on the outcome remission rates. ....                                            | 47 |
| References .....                                                                                                                               | 48 |

Search strategies for ‘Duloxetine for major depressive disorder’  
(Faiza Siddiqui)  
Searches performed 23 January 2023

Total number of records identified: 4715 records  
Number of duplicates excluded: 1314 records  
Number of records in final list: 3401 records  
Number of new records sent to authors: 173 records

Cochrane Central Register of Controlled Trials (2023, Issue 1) in the Cochrane Library (23 January 2023) (867 hits)

- #1 MeSH descriptor: [Duloxetine Hydrochloride] explode all trees
- #2 (duloxetin\* or cymbalta\* or Irenka\* or ariclaim or xeristar or yentreve or duzela or c-pact or combac or delok or deneurone or detine or dimorex or DLX or dulane or dulex or dulife or dulojoy or dulok or dulomax or dulonix or dulot\* or dulox\* or dultin or dulx or dumore or duonex\* or dureep or dutin\* or duxet or duzac or duzela or DXT or neuroxetin or nudep or sylonex or symbal or sympta or ulozet or verlox)
- #3 #1 or #2
- #4 MeSH descriptor: [Depressive Disorder, Major] explode all trees
- #5 MeSH descriptor: [Depressive Disorder] this term only
- #6 MeSH descriptor: [Seasonal Affective Disorder] explode all trees
- #7 MeSH descriptor: [Dysthymic Disorder] explode all trees
- #8 MeSH descriptor: [Depression] explode all trees
- #9 MeSH descriptor: [Affective Symptoms] this term only
- #10 (MDD or depress\* or ((affective or adjustment or dysthym\* or mood) and (disorder\* or disease\* or symptom\*)) or dysthymia or alexithymia or (involutional and (melancholia or paraphrenia\* or psychos\*)) or (emotion\* and disturbance\*))
- #11 #4 or #5 or #6 or #7 or #8 or #9 or #10
- #12 #3 and #11

MEDLINE Ovid (1946 to 23 January 2023) (597 hits)

- 1. exp Duloxetine Hydrochloride/
- 2. (duloxetin\* or cymbalta\* or Irenka\* or ariclaim or xeristar or yentreve or duzela or c-pact or combac or delok or deneurone or detine or dimorex or DLX or dulane or dulex or dulife or dulojoy or dulok or dulomax or dulonix or dulot\* or dulox\* or dultin or dulx or dumore or duonex\* or dureep or dutin\* or duxet or duzac or duzela or DXT or neuroxetin or nudep or sylonex or symbal or sympta or ulozet or verlox).mp. [mp=title, abstract, heading word, drug trade name, original title, device manufacturer, drug manufacturer, device trade name, keyword heading word, floating subheading word, candidate term word]
- 3. 1 or 2
- 4. exp Depressive Disorder, Major/
- 5. Depressive Disorder/

6. exp Seasonal Affective Disorder/
7. exp Dysthymic Disorder/
8. exp Depression/
9. Affective Symptoms/
10. (MDD or depress\* or ((affective or adjustment or dysthym\* or mood) and (disorder\* or disease\* or symptom\*)) or dysthymia or alexithymia or (involuntal and (melancholia or paraphrenia\* or psychos\*)) or (emotion\* and disturbance\*)).mp. [mp=title, abstract, heading word, drug trade name, original title, device manufacturer, drug manufacturer, device trade name, keyword heading word, floating subheading word, candidate term word]
11. 4 or 5 or 6 or 7 or 8 or 9 or 10
12. 3 and 11
13. (randomized controlled trial or controlled clinical trial or retracted publication or retraction of publication).pt. or clinical trials as topic.sh. or trial.ti.
14. (random\* or blind\* or placebo\*).mp. [mp=title, abstract, heading word, drug trade name, original title, device manufacturer, drug manufacturer, device trade name, keyword heading word, floating subheading word, candidate term word]
15. 12 and (13 or 14)

#### Embase Ovid (1974 to 23 January 2023) (2253 hits)

1. exp duloxetine/
2. (duloxetin\* or cymbalta\* or Irenka\* or ariclaim or xeristar or yentreve or duzela or c-pact or combac or delok or deneurone or detine or dimorex or DLX or dulane or dulex or dulife or dulojoy or dulok or dulomax or dulonix or dulot\* or dulox\* or dultin or dulx or dumore or duonex\* or dureep or dutin\* or duxet or duzac or duzela or DXT or neuroxetin or nudep or sylonex or symbal or sympta or ulozet or verlox).mp. [mp=title, abstract, heading word, drug trade name, original title, device manufacturer, drug manufacturer, device trade name, keyword heading word, floating subheading word, candidate term word]
3. 1 or 2
4. exp major depression/
5. depression/
6. exp seasonal affective disorder/
7. exp dysthymia/
8. emotional disorder/
9. (MDD or depress\* or ((affective or adjustment or dysthym\* or mood) and (disorder\* or disease\* or symptom\*)) or dysthymia or alexithymia or (involuntal and (melancholia or paraphrenia\* or psychos\*)) or (emotion\* and disturbance\*)).mp. [mp=title, abstract, heading word, drug trade name, original title, device manufacturer, drug manufacturer, device trade name, keyword heading word, floating subheading word, candidate term word]
10. 4 or 5 or 6 or 7 or 8 or 9
11. 3 and 10
12. Randomized controlled trial/ or Controlled clinical trial/ or retracted article/ or (erratum or tombstone).pt. or trial.ti. or yes.ne.
13. (random\* or blind\* or placebo\*).mp. [mp=title, abstract, heading word, drug trade name, original title, device manufacturer, drug manufacturer, device trade name, keyword heading word, floating subheading word, candidate term word]
14. 11 and (12 or 13)

#### PsycINFO (EBSCOhost; 1806 to 3 June 2022) (438 hits)

- S14 S12 AND S13  
 S13 TX (random\* or blind\* or placebo\* or trial\*)

S12 S3 AND S11  
 S11 S4 OR S5 OR S6 OR S7 OR S8 OR S9 OR S10  
 S10 TX (MDD or depress\* or ((affective or adjustment or dysthym\* or mood) and (disorder\* or disease\* or symptom\*)) or dysthymia or alexithymia or (involutional and (melancholia or paraphrenia\* or psychos\*)) or (emotion\* and disturbance\*))  
 S9 MA affective symptoms  
 S8 MA depression  
 S7 MA dysthymic disorder  
 S6 MA seasonal affective disorder  
 S5 MA depressive disorder  
 S4 MA Depressive Disorder, Major  
 S3 S1 OR S2 Expanders - Apply equivalent subjects  
 S2 TX (duloxetine\* or cymbalta\* or Irenka\* or ariclaim or xeristar or yentreve or duzela or c-pact or combac or delok or deneurone or detine or dimorex or DLX or dulane or dulex or dulife or dulojoy or dulok or dulomax or dulonix or dulot\* or dulox\* or dultin or dulx or dumore or duonex\* or dureep or dutin\* or duxet or duzac or duzela or DXT or neuroxetin or nudep or sylonex or symbal or sympta or ulozet or verlox)  
 S1 MA Duloxetine

#### **LILACS (VHL Regional Portal; 1982 to 23 January 2023) (20 hits)**

((duloxetine\* OR cymbalta\* OR irenka\* OR ariclaim OR xeristar OR yentreve OR duzela OR c-pact OR combac OR delok OR deneurone OR detine OR dimorex OR dlx OR dulane OR dulex OR dulife OR dulojoy OR dulok OR dulomax OR dulonix OR dulot\* OR dulox\* OR dultin OR dulx OR dumore OR duonex\* OR dureep OR dutin\* OR duxet OR duzac OR duzela OR dxt OR neuroxetin OR nudep OR sylonex OR symbal OR sympta OR ulozet OR verlox)) AND ((mdd OR depress\* OR ((affective OR adjustment OR dysthym\* OR mood) AND (disorder\* OR disease\* OR symptom\*)) OR dysthymia OR alexithymia OR (involutional AND (melancholia OR paraphrenia\* OR psychos\*)) OR (emotion\* AND disturbance\*))) AND ( db:"LILACS")

#### **Science Citation Index Expanded (Web of Science; 1900 to 23 January 2023) and Conference Proceedings Citation Index – Science (Web of Science; 1990 to 23 January 2023) (978 hits)**

#5 #3 AND #4

#4 TI=(random\* or blind\* or placebo\* or trial\*) OR TS=(random\* or blind\* or placebo\*)

#3 #2 AND #1

#2 TS=(MDD or depress\* or ((affective or adjustment or dysthym\* or mood) and (disorder\* or disease\* or symptom\*)) or dysthymia or alexithymia or (involutional and (melancholia or paraphrenia\* or psychos\*)) or (emotion\* and disturbance\*))

#1 TS=(duloxetine\* or cymbalta\* or Irenka\* or ariclaim or xeristar or yentreve or duzela or c-pact or combac or delok or deneurone or detine or dimorex or DLX or dulane or dulex or dulife or dulojoy or dulok or dulomax or dulonix or dulot\* or dulox\* or dultin or dulx or dumore or duonex\* or dureep or dutin\* or duxet or duzac or duzela or DXT or neuroxetin or nudep or sylonex or symbal or sympta or ulozet or verlox)

Supplementary table S2: Summary of serious adverse events in the included trials.

| Trial                  | Participants receiving duloxetine                                                        |                                      | Participants receiving placebo                                        |                                      |
|------------------------|------------------------------------------------------------------------------------------|--------------------------------------|-----------------------------------------------------------------------|--------------------------------------|
|                        | Types of SAEs                                                                            | Proportion of participants with SAEs | Types of SAEs                                                         | Proportion of participants with SAEs |
| Baldwin 2012           | Middle ear effusion, serotonin syndrome                                                  | 2 out of 155                         | Serotonin syndrome, adenomyosis, pulmonary embolism                   | 3 out of 148                         |
| Boulenger 2014         | Suicidal behavior and self harm, intentional overdose, vaginal haemorrhage               | 3 out of 147                         |                                                                       | 0 out of 158                         |
| Detke 2002 A           |                                                                                          | 0 out of 123                         | Umbilical hernia, emphysema with pneumonia, chest pain                | 3 out of 122                         |
| Detke 2002 B           | Breast carcinoma                                                                         | 1 out of 128                         |                                                                       | 0 out of 139                         |
| Goldstein 2004 B       | Accidental injury falling from a horse, suffering a concussion and a subsequent seizure. | 1 out of 91                          |                                                                       | 0 out of 45                          |
| Katona 2012            | Prostate cancer, suicide attempt                                                         | 2 out of 151                         | Hip fracture, bile duct cancer, depression, transient ischemic attack | 4 out of 145                         |
| Mahableshwarkar 2013   | Myocardial infarction, panic attack                                                      | 2 out of 150                         | Elective abortion, worsening of depression                            | 2 out of 151                         |
| Mahableshwarkar 2015 B | Craniocerebral injury                                                                    | 1 out of 207                         | Acute myocardial infarction, worsening of depression                  | 2 out of 191                         |
| Nierenberg 2007        | Not specified                                                                            | 3 out of 273                         | Not specified                                                         | 2 out of 137                         |

|                   |                                             |              |                                               |              |
|-------------------|---------------------------------------------|--------------|-----------------------------------------------|--------------|
| Oakes 2012 A      | Not specified                               | 6 out of 257 | Suicide attempt, others not specified         | 3 out of 127 |
| Oakes 2012 B      | Ruptured cerebral aneurysm, suicide attempt | 2 out of 261 | Suicide, others not specified                 | 7 out of 131 |
| Perahia 2006 B    | Major depression                            | 1 out of 103 |                                               | 0 out of 50  |
| Raskin 2007       | Not specified                               | 1 out of 207 | Not specified                                 | 4 out of 104 |
| Tourian 2009      | Suicide attempts                            | 2 out of 157 | Accidental injury, asthma                     | 2 out of 161 |
| F1J-MC-HMAI (A)   | Suicide attempt                             | 1 out of 130 |                                               | 0 out of 41  |
| F1J-MC-HMAI (C)   | Suicide attempt                             | 1 out of 131 | Suicide attempt                               | 1 out of 41  |
| F1J-MC-HMAQ b (B) |                                             | 0 out of 82  | Infectious colitis, food poisoning            | 2 out of 75  |
| 11918A            | Not specified                               | 1 out of 133 | Not specified                                 | 1 out of 136 |
| F1J-MC-HMAT a (B) | Cardiopulmonary arrest leading to death     | 1 out of 84  | Hospitalization due to exacerbation of asthma | 1 out of 45  |
| F1J-MC-HMAH       | Maniac episode, overdose                    | 9 out of 89  | Accidental injury, hostility, overdose        | 8 out of 88  |



Supplementary Table S3: Meta-analysis of individual non-serious adverse events.

| Non-serious adverse events | No of trials | n* duloxetine group | N** duloxetine group | n* control group | N** control group | RR <sup>‡</sup> | 95% CI     | P-value | NNH    |
|----------------------------|--------------|---------------------|----------------------|------------------|-------------------|-----------------|------------|---------|--------|
| Nausea                     | 30           | 957                 | 3982                 | 244              | 2856              | 2.92            | 2.38-3.58  | <0.0001 | 6.46   |
| Dry mouth                  | 30           | 627                 | 3982                 | 222              | 2856              | 2.05            | 1.67-2.52  | <0.0001 | 12.54  |
| Somnolence                 | 26           | 306                 | 3110                 | 96               | 2249              | 2.4             | 1.81-3.18  | <0.0001 | 17.95  |
| Sweating                   | 27           | 252                 | 3521                 | 55               | 2517              | 2.88            | 1.95-4.26  | <0.0001 | 20.11  |
| Dizziness                  | 30           | 399                 | 3982                 | 156              | 2856              | 1.88            | 1.49-2.38  | <0.0001 | 21.94  |
| Yawn                       | 11           | 45                  | 1569                 | 1                | 1177              | 5.54            | 2.32-13.22 | 0.0001  | 35.93  |
| Appetite decreased         | 9            | 83                  | 1469                 | 18               | 1129              | 3.33            | 1.8-6.15   | 0.0001  | 24.66  |
| Insomnia                   | 25           | 304                 | 3113                 | 133              | 2097              | 1.64            | 1.27-2.11  | 0.0001  | 29.21  |
| Anorexia                   | 15           | 100                 | 1671                 | 22               | 1043              | 2.85            | 1.6-5.06   | 0.0004  | 25.81  |
| Constipation               | 28           | 359                 | 3628                 | 132              | 2507              | 1.79            | 1.3-2.47   | 0.0004  | 21.6   |
| Withdrawal syndrome        | 1            | 49                  | 334                  | 24               | 250               | 2.09            | 1.35-3.24  | 0.0009  | 19.72  |
| Vomiting                   | 22           | 135                 | 2556                 | 39               | 1799              | 2.28            | 1.4-3.71   | 0.0009  | 32.11  |
| Diarrhea                   | 30           | 376                 | 3982                 | 203              | 2856              | 1.38            | 1.12-1.71  | 0.0028  | 42.83  |
| Fatigue                    | 13           | 143                 | 2284                 | 48               | 1609              | 2.06            | 1.28-3.3   | 0.0029  | 30.51  |
| Libido decreased           | 13           | 54                  | 1671                 | 13               | 1043              | 2.37            | 1.22-4.61  | 0.0111  | 50.37  |
| Vasodilatation             | 13           | 55                  | 1287                 | 16               | 851               | 2.08            | 1.11-3.89  | 0.0215  | 41.78  |
| Back pain                  | 20           | 62                  | 2128                 | 65               | 1514              | 0.64            | 0.42-0.95  | 0.0288  | -72.48 |
| Hyperventilation           | 3            | 0                   | 460                  | 4                | 196               | 0.14            | 0.02-0.82  | 0.0299  | -49    |
| Pain                       | 16           | 64                  | 1782                 | 77               | 1264              | 0.65            | 0.43-0.97  | 0.0352  | -40    |
| Breast pain                | 8            | 3                   | 1055                 | 8                | 600               | 0.33            | 0.11-0.99  | 0.048   | -95.33 |

\*n= no of events

\*\*N= no analyzed

‡RR= relative risk

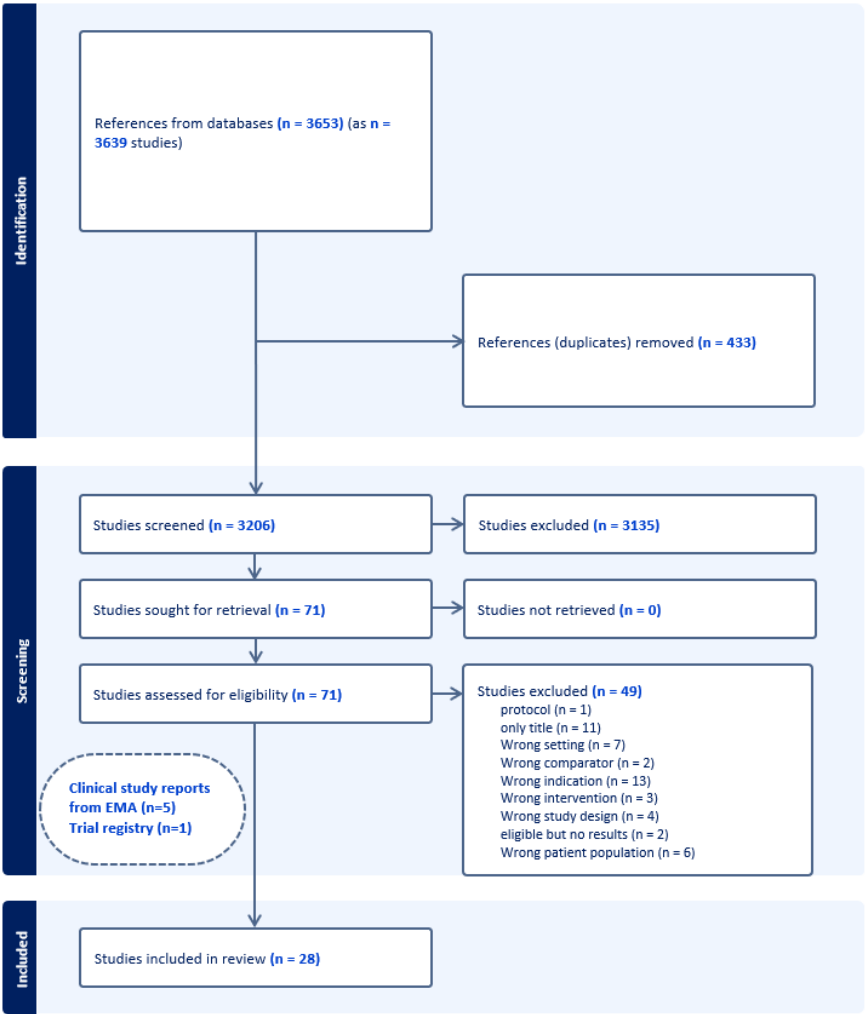

Supplementary Fig S1: PRISMA flow chart.

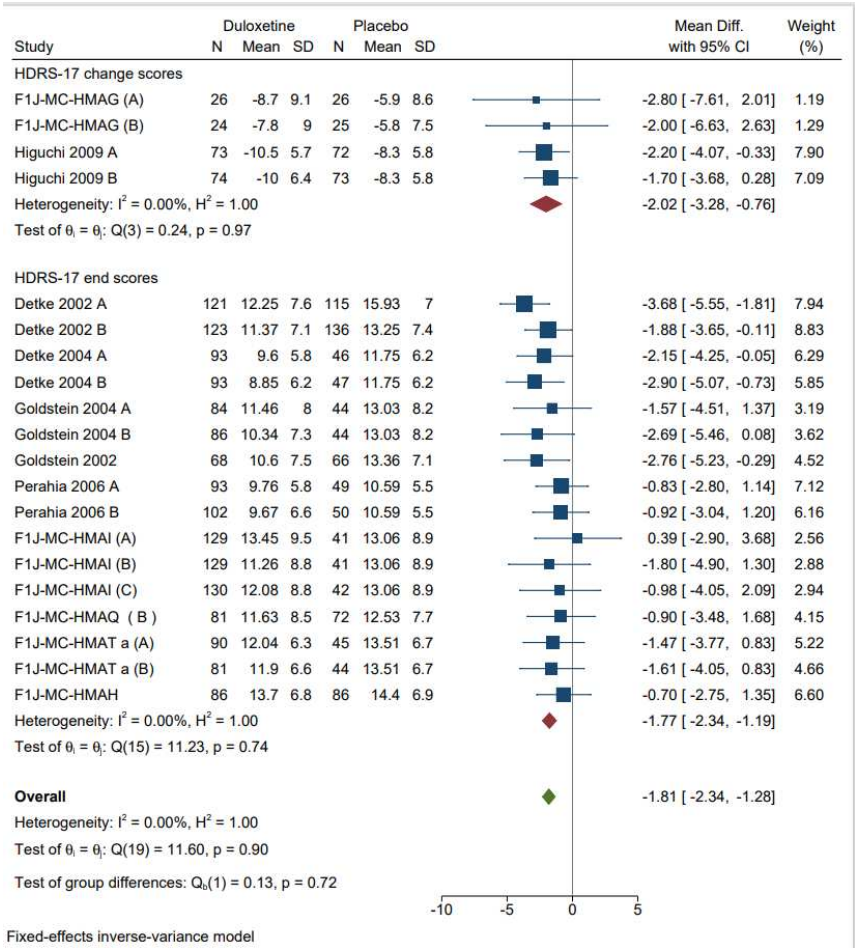

Supplementary Fig S2: Meta-analysis of duloxetine vs. placebo for the outcome HDRS-17 scores.

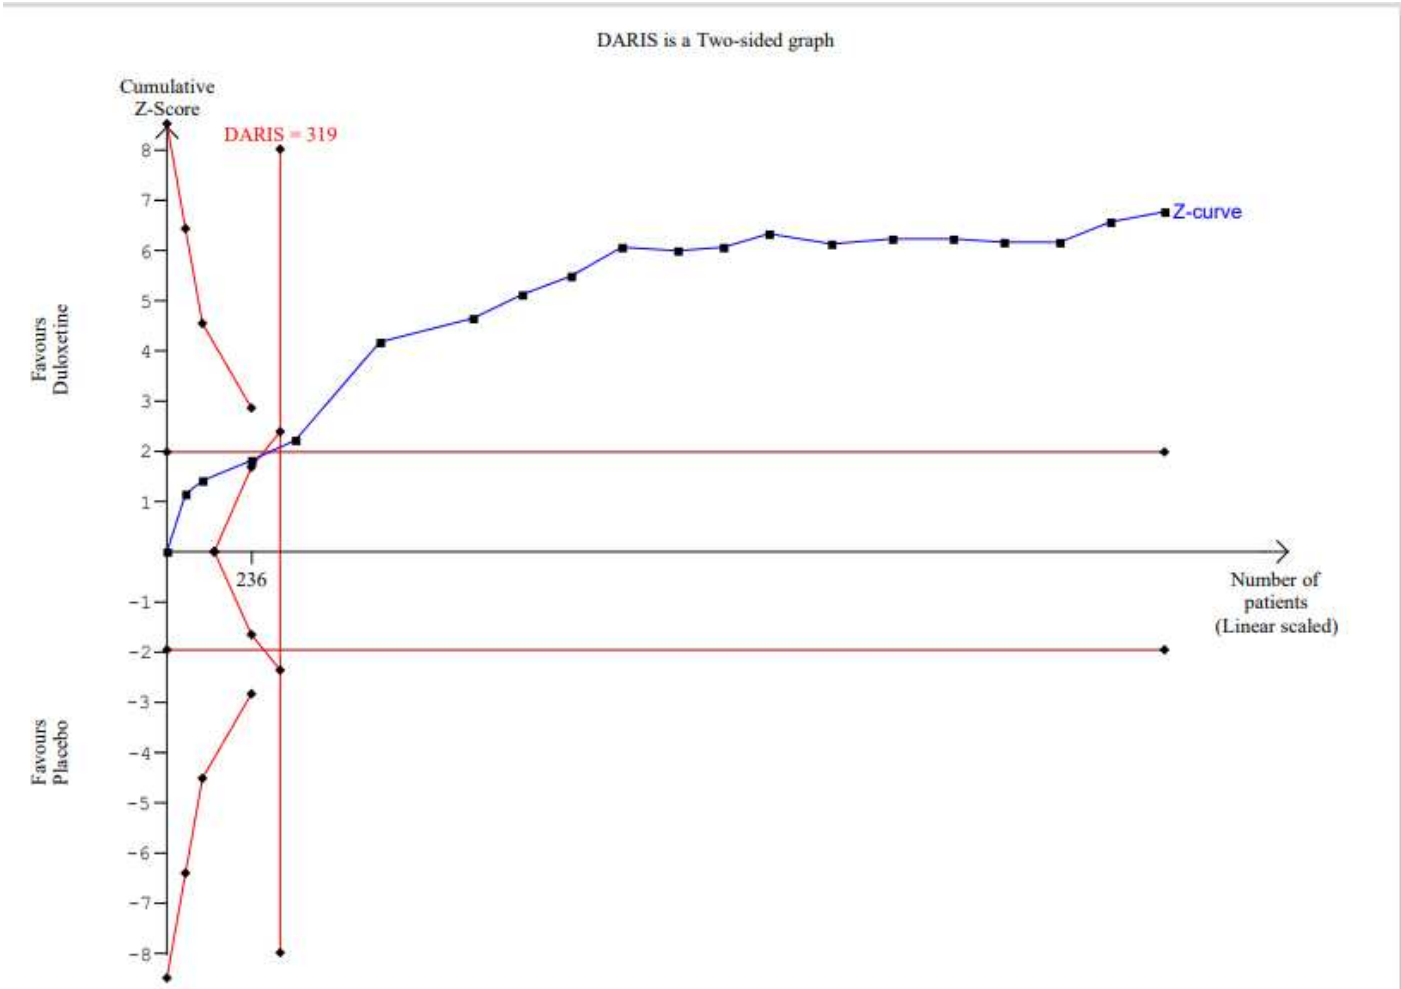

Supplementary Fig S3: Trial Sequential Analysis of duloxetine vs. placebo for the outcome HDRS-17.

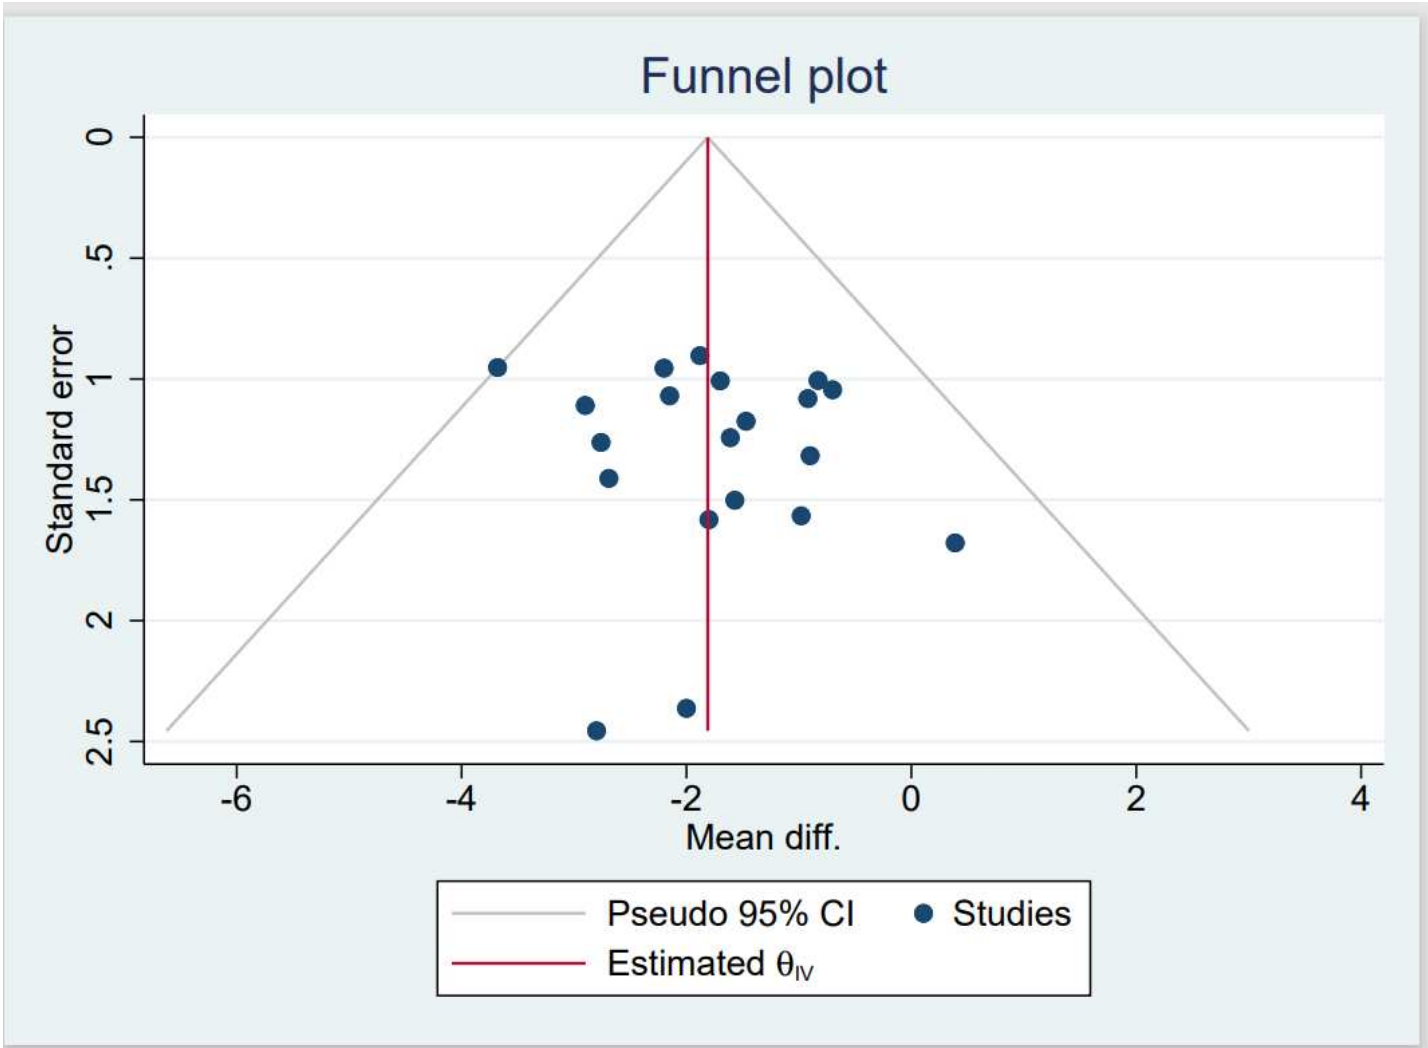

Supplementary Fig S4: Funnel plot of duloxetine vs. placebo for the outcome HDRS-17 scores.

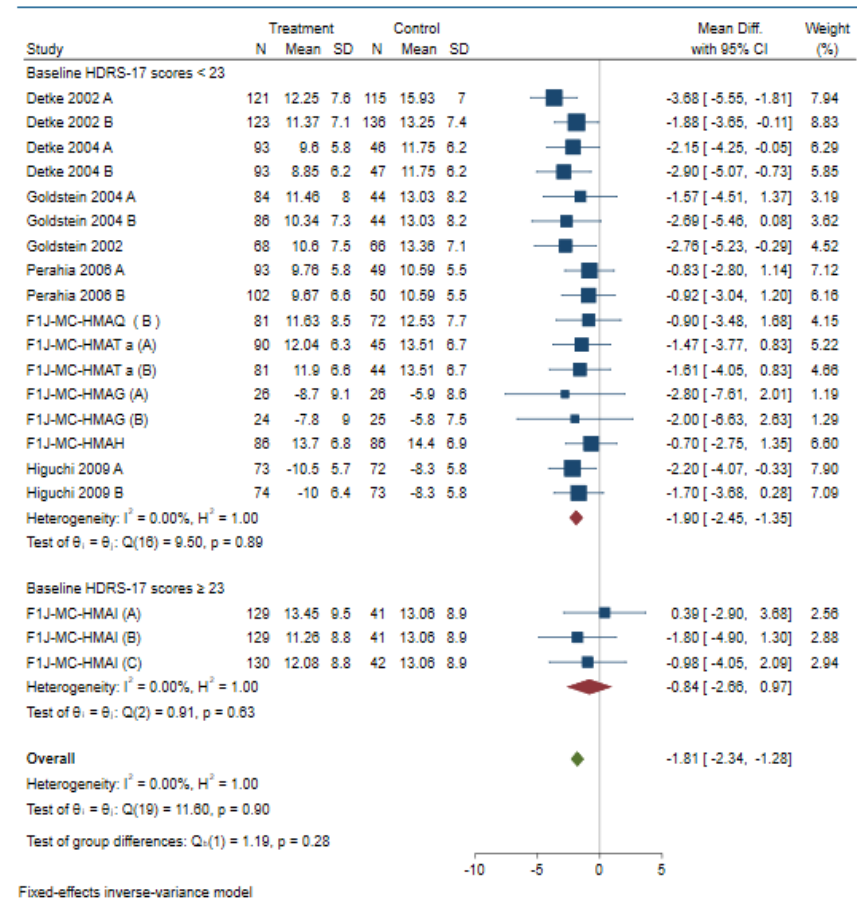

Supplementary Fig S5: Subgroup analysis of duloxetine vs. placebo on HDRS-17 for baseline HDRS-17 scores.

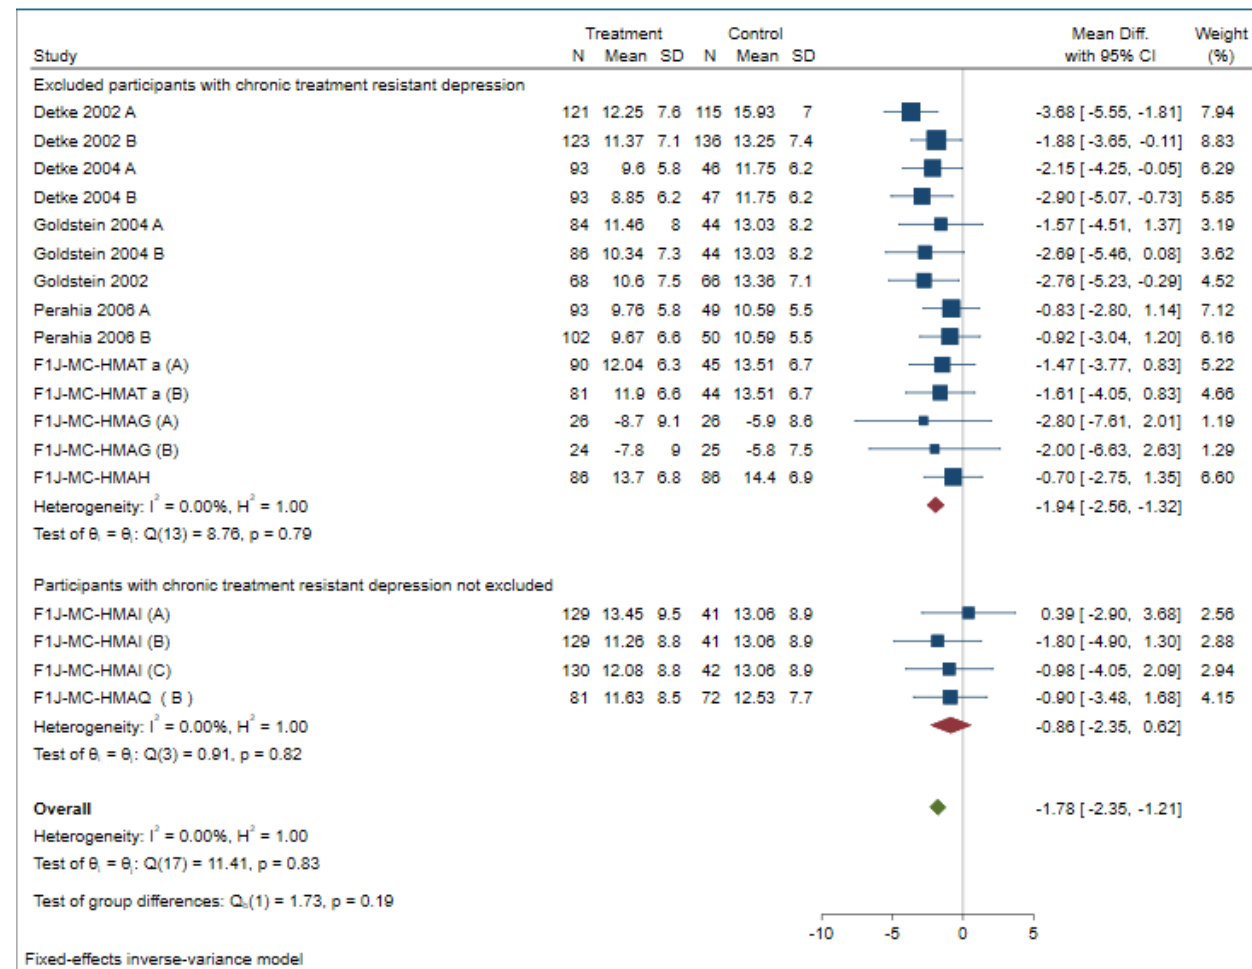

Supplementary Fig S6: Subgroup analysis of duloxetine vs. placebo on HDRS-17 for chronic or treatment resistant depression.

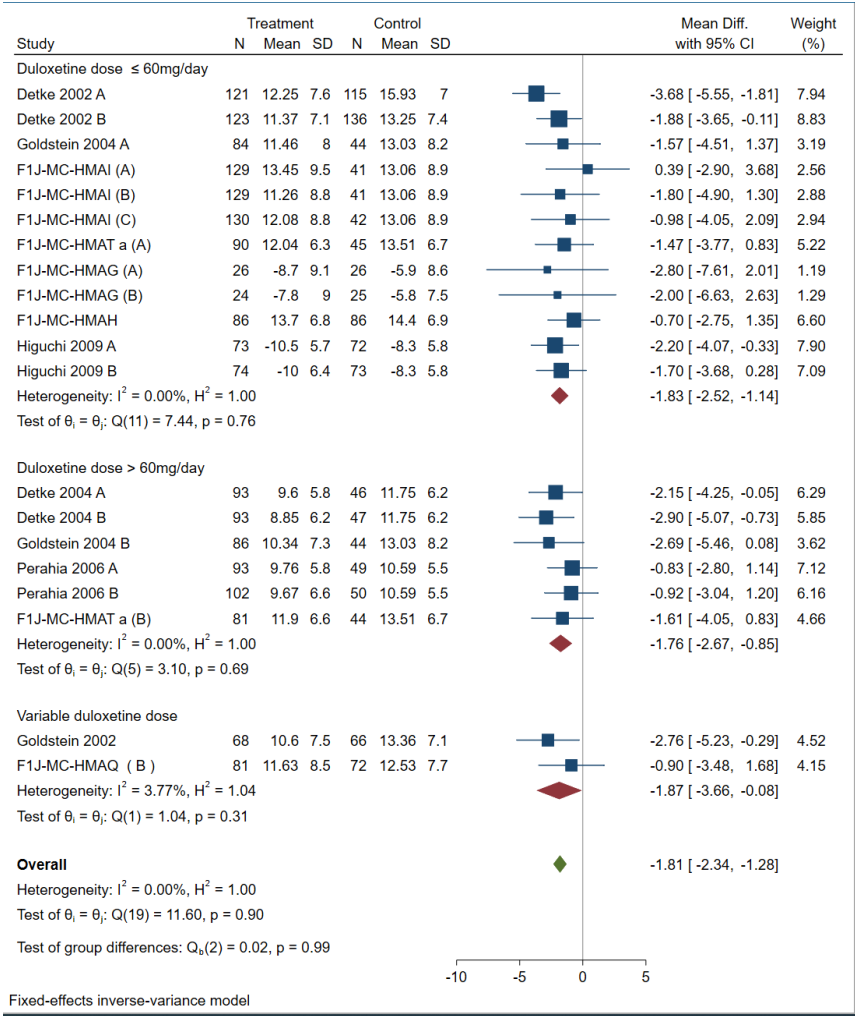

Supplementary Fig S7: Subgroup analysis of duloxetine vs. placebo on HDRS-17 for duloxetine dose.



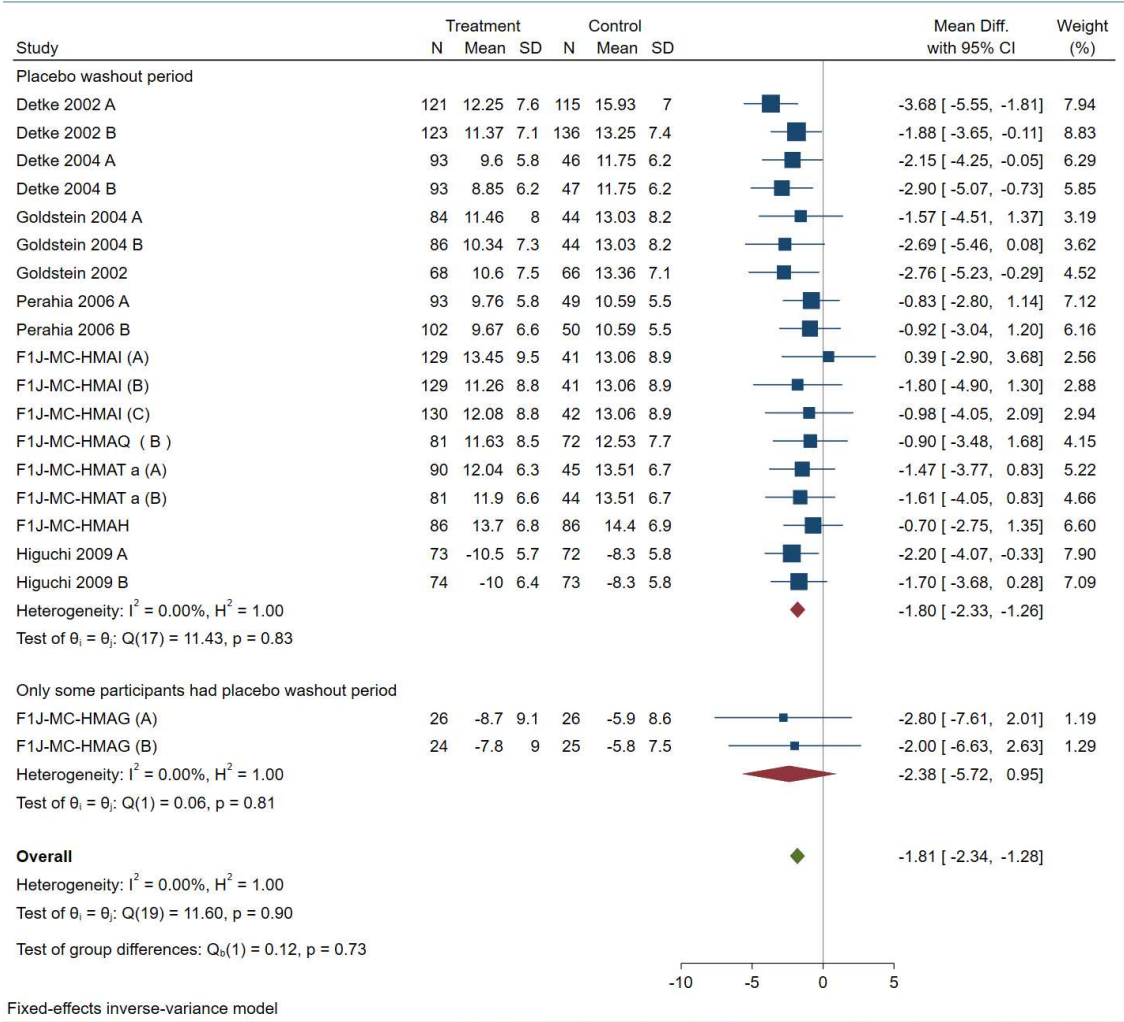

Supplementary Fig S8: Subgroup analysis of placebo washout period on HDRS-17.

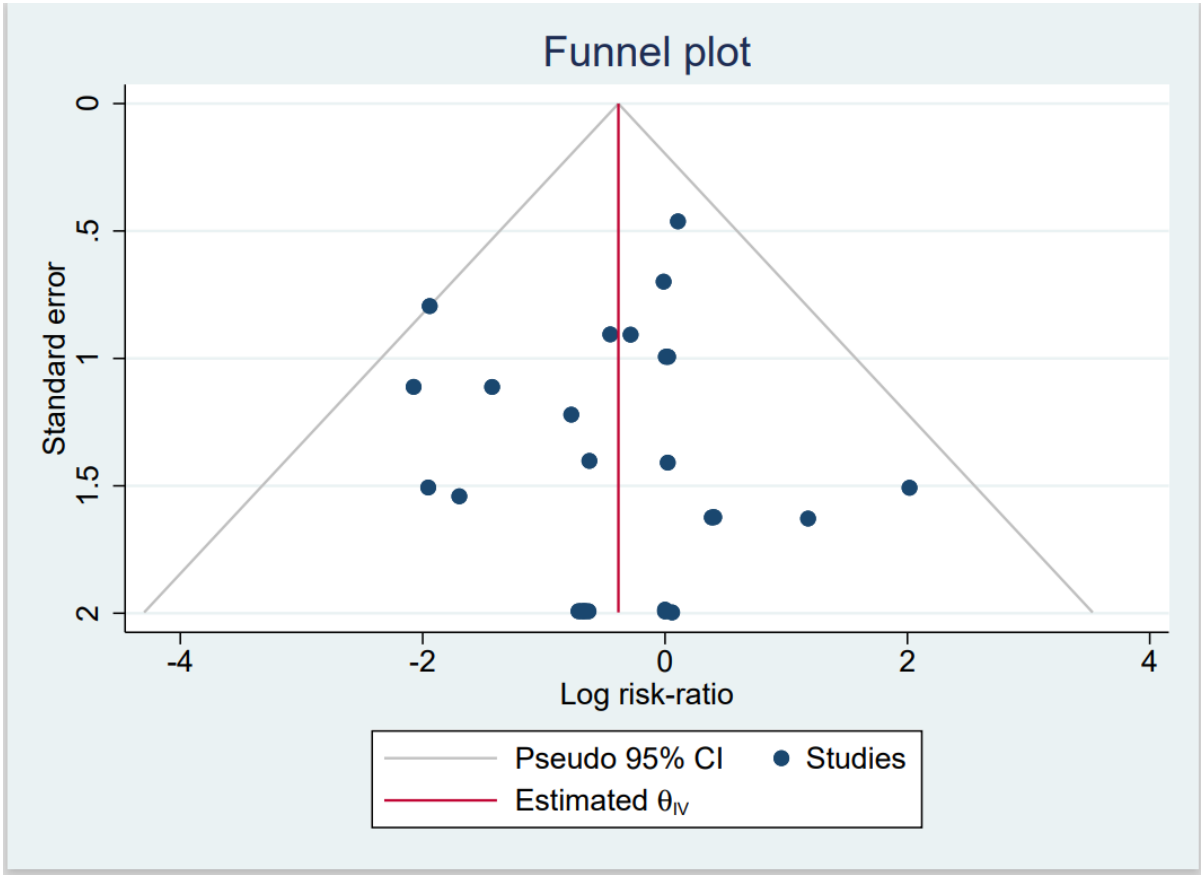

Supplementary Fig S9: Funnel plot of duloxetine vs. placebo for the outcome serious adverse events.

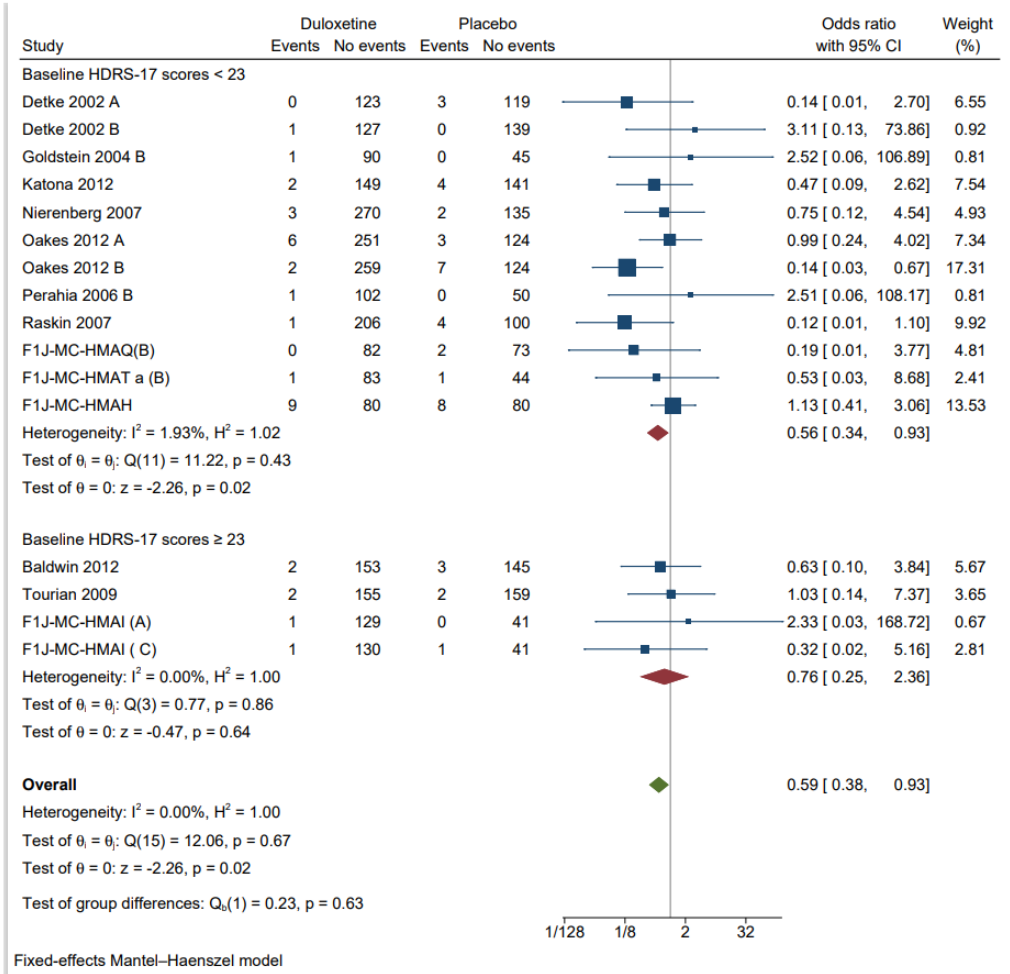

Supplementary Fig S10: Subgroup analysis of baseline HDRS scores on serious adverse events.

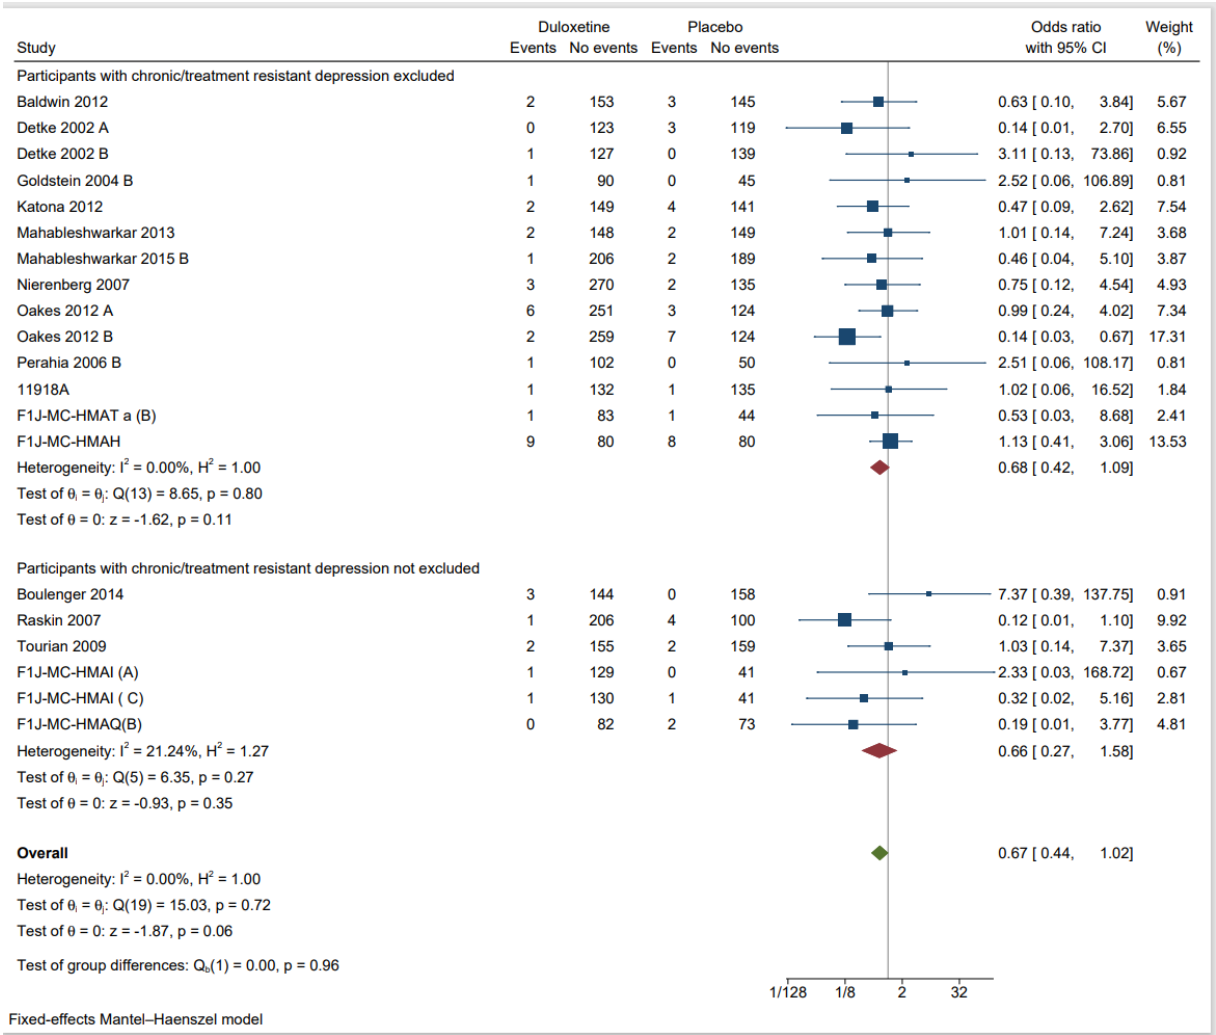

Supplementary Fig S11: Subgroup analysis of chronic treatment resistant depression on serious adverse events.



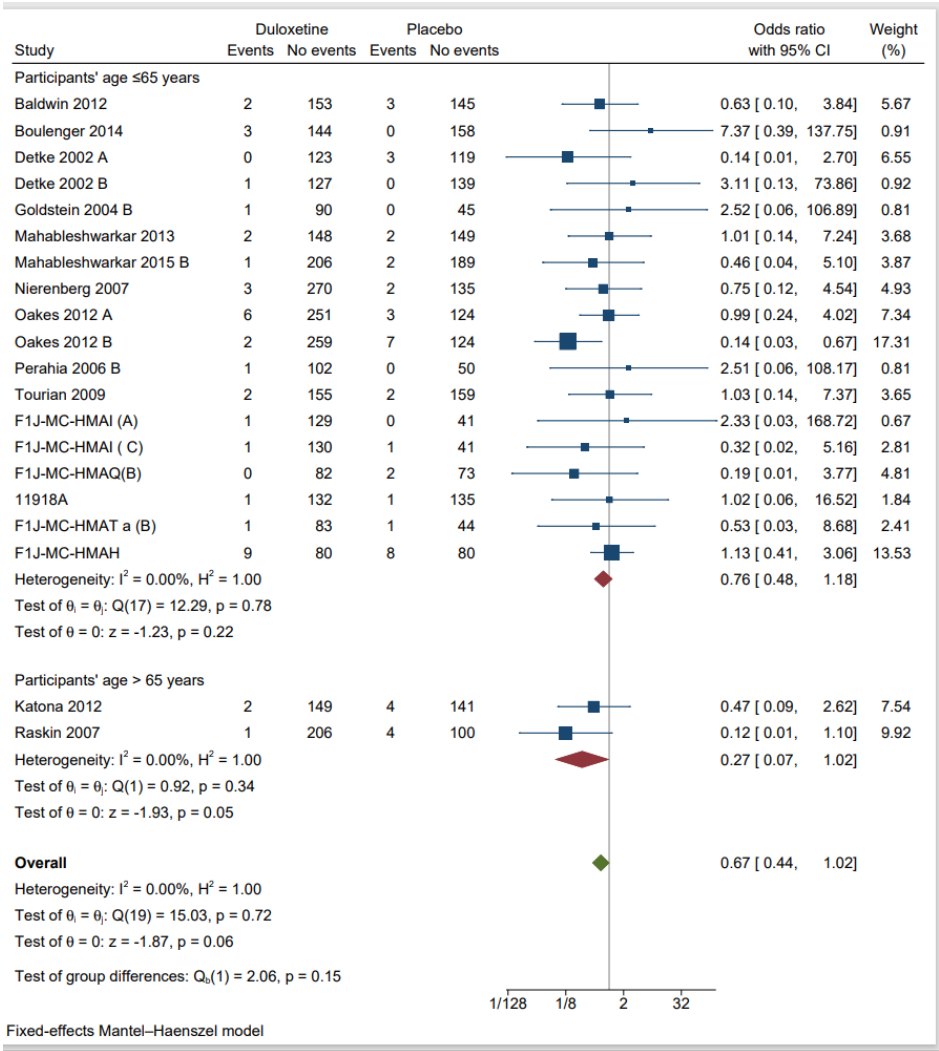

Supplementary Fig S12: Subgroup analysis of participants' age on serious adverse events.

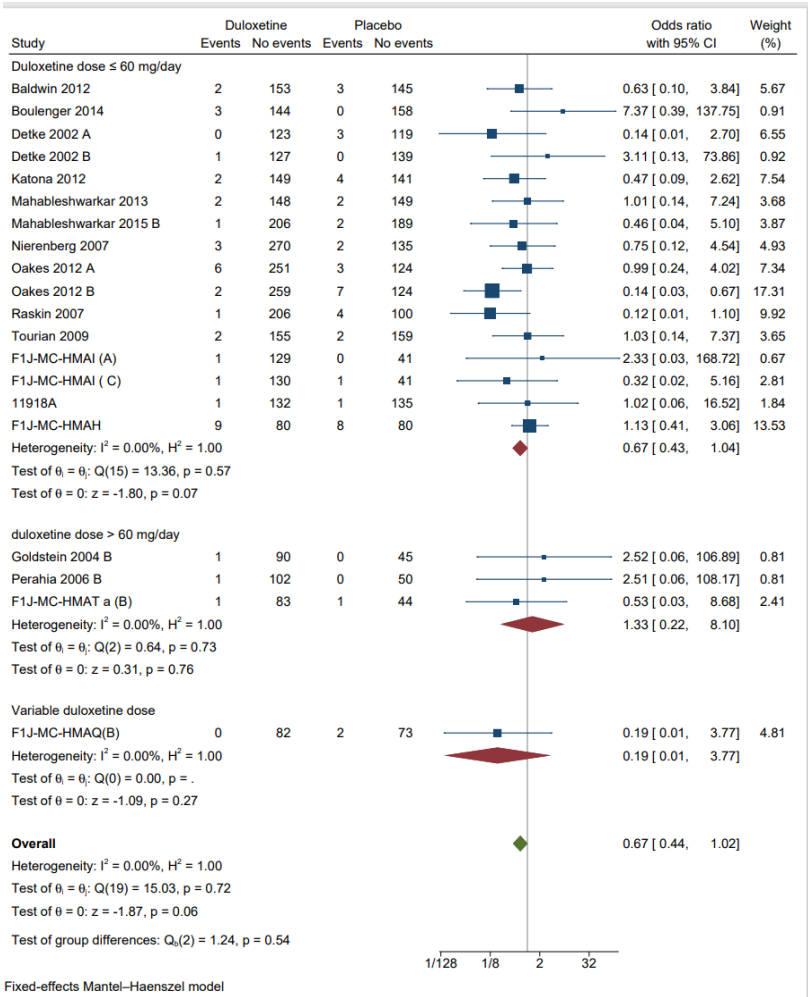

Supplementary Fig S13: Subgroup analysis of duloxetine dose on serious adverse events.

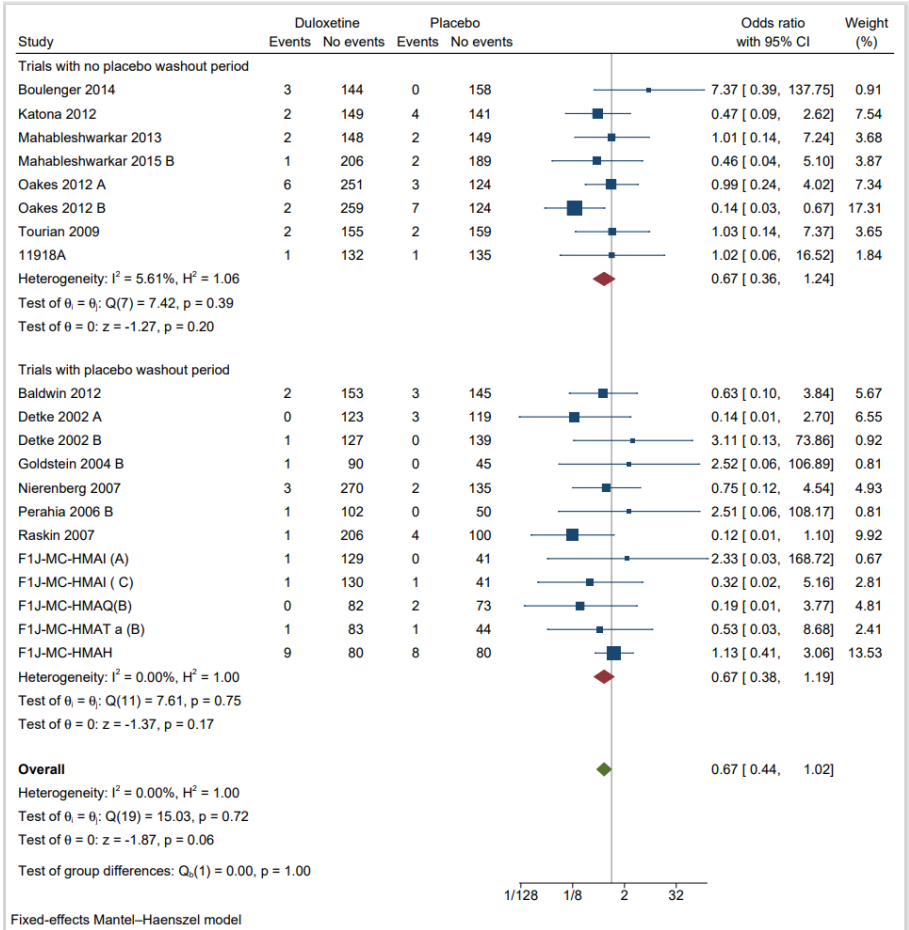

Supplementary Fig S14: Subgroup analysis of placebo washout period on serious adverse events.



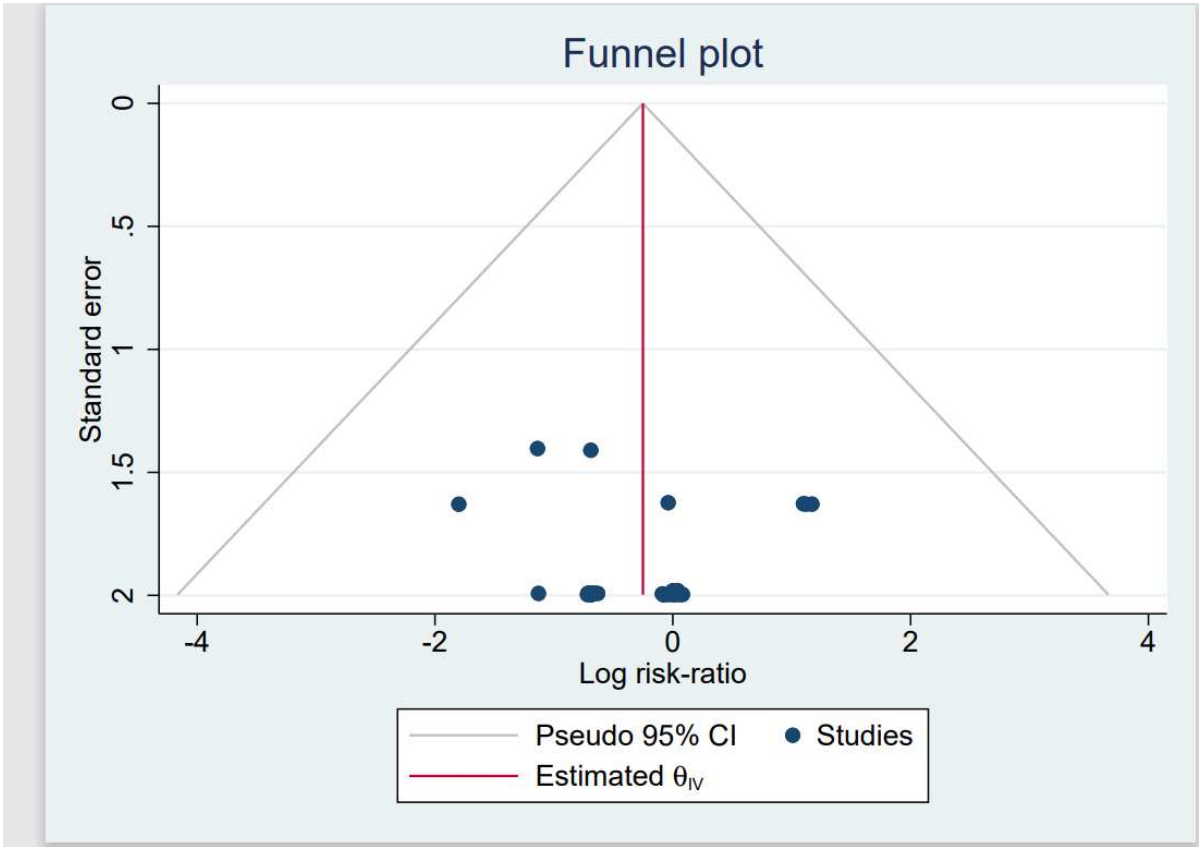

Supplementary Fig S15: Funnel plot duloxetine vs. placebo for the outcome suicide or suicide attempt.

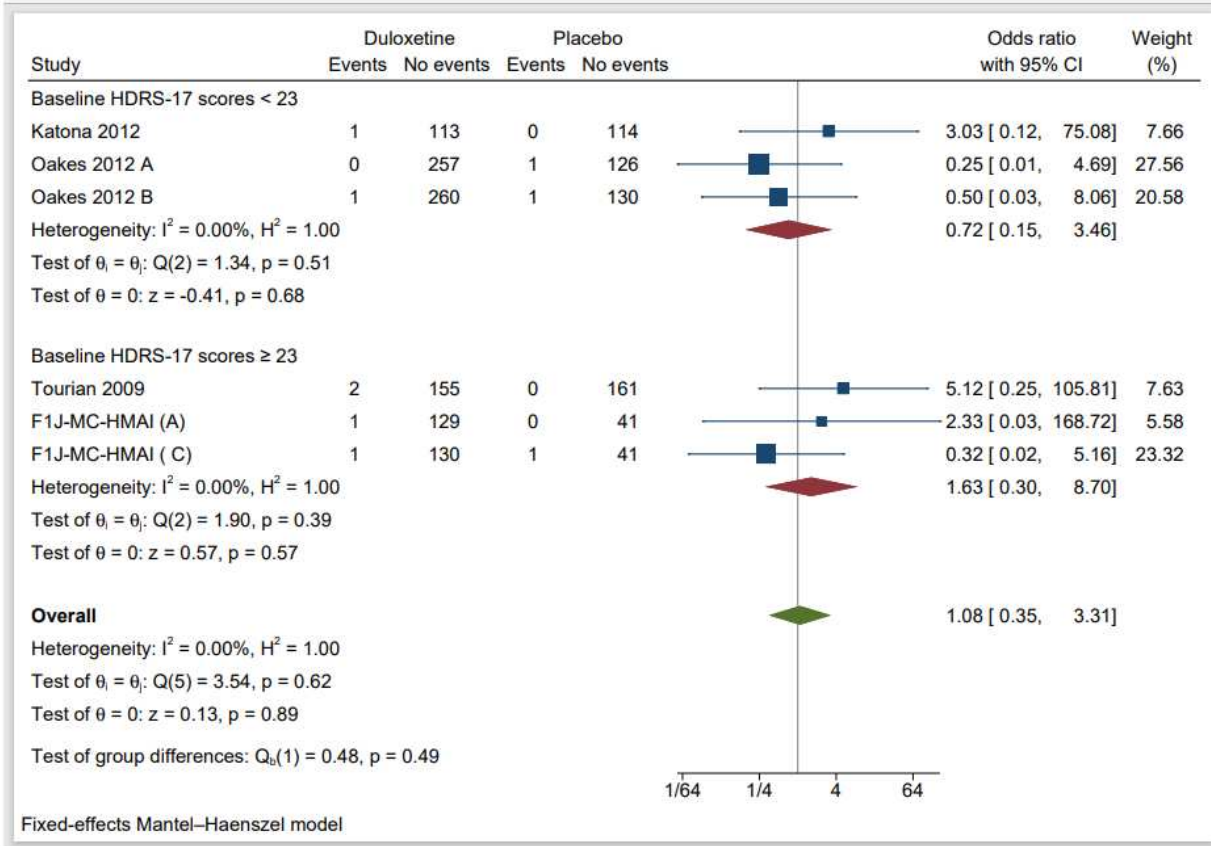

Supplementary Fig S16: Subgroup analysis of baseline HDRS scores on suicide and suicide attempts.

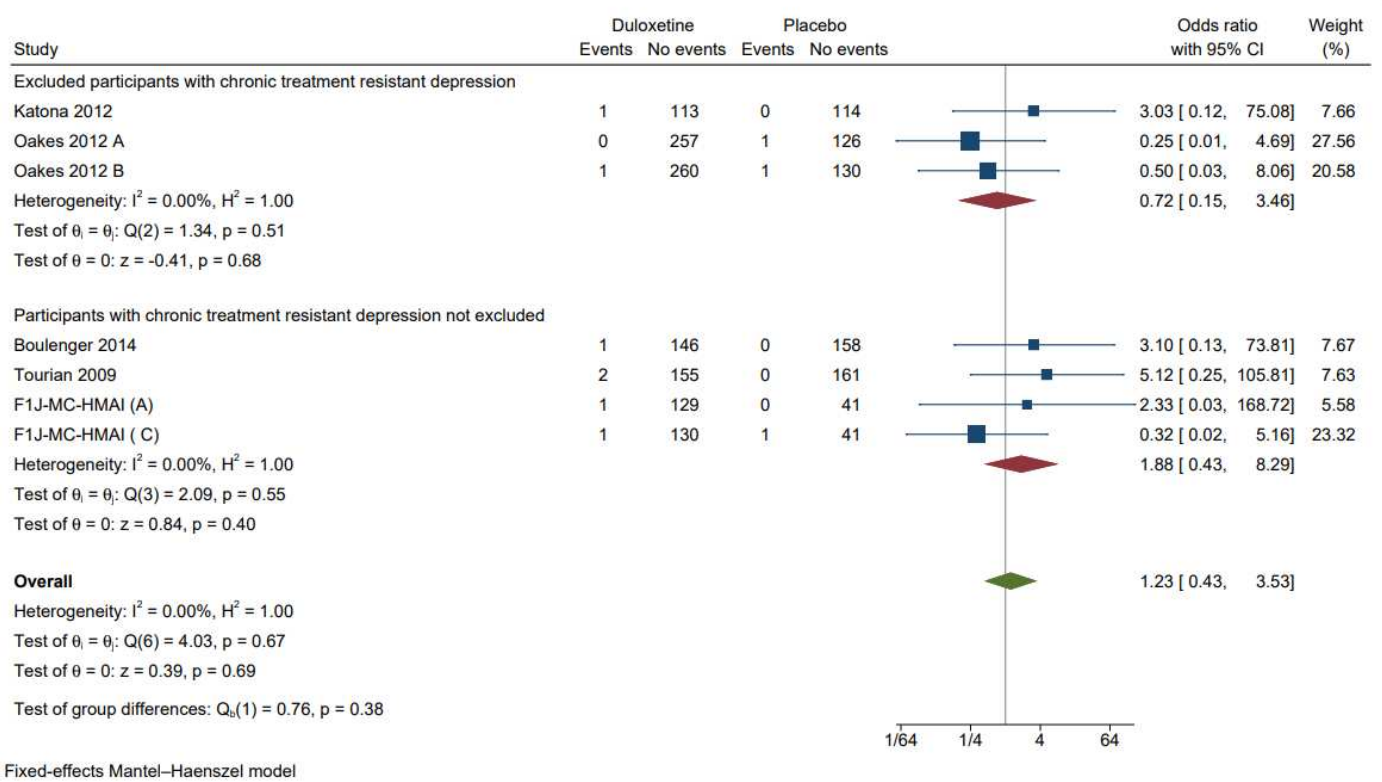

Supplementary Fig S17: Subgroup analysis of chronic treatment resistant depression on suicide and suicide attempts.

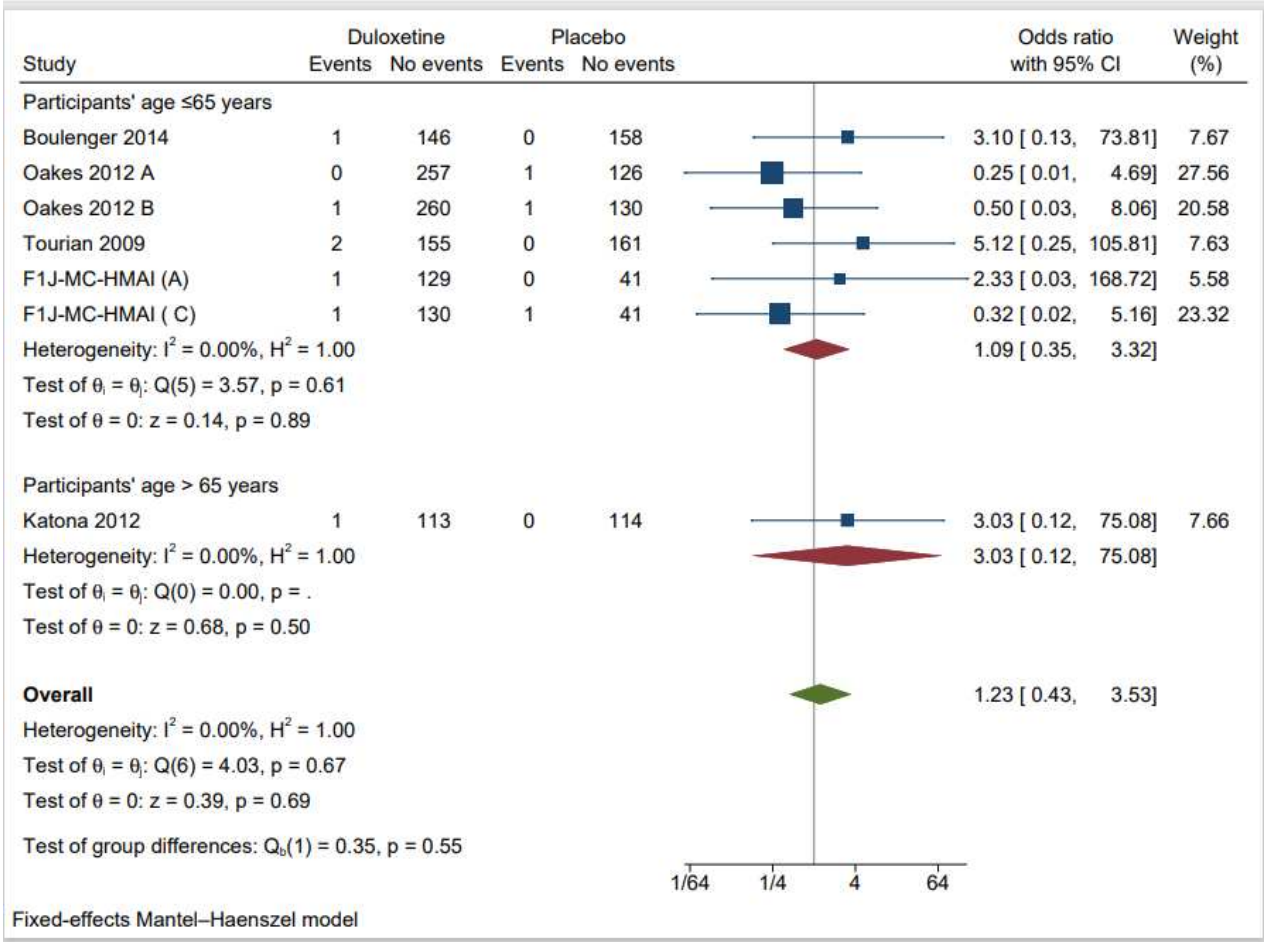

Supplementary Fig S18: Subgroup analysis of participants' age on suicide and suicide attempts.

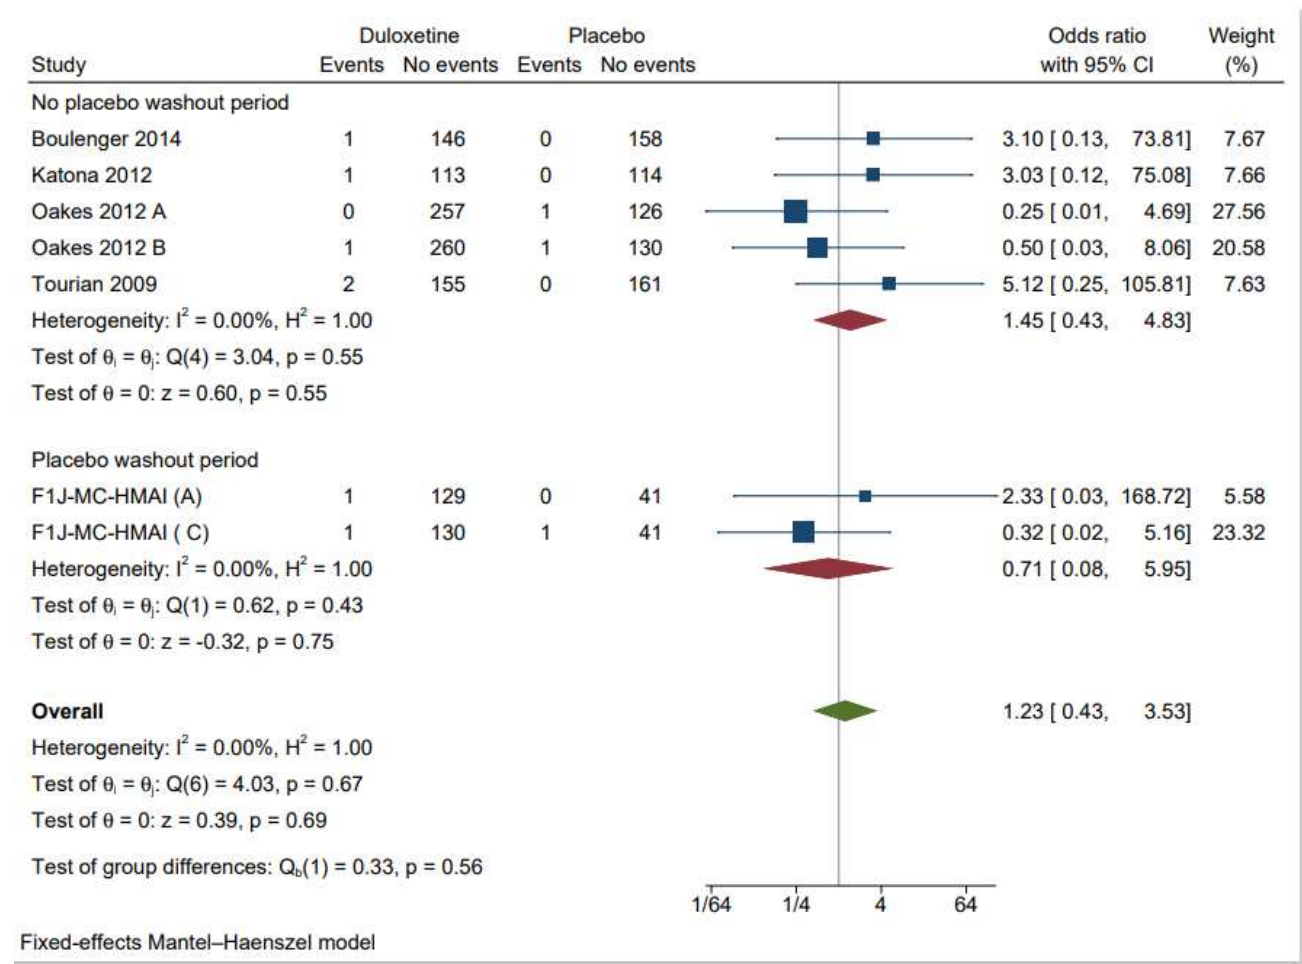

Supplementary Fig S 19: Subgroup analysis of placebo washout period on suicide and suicide attempts.

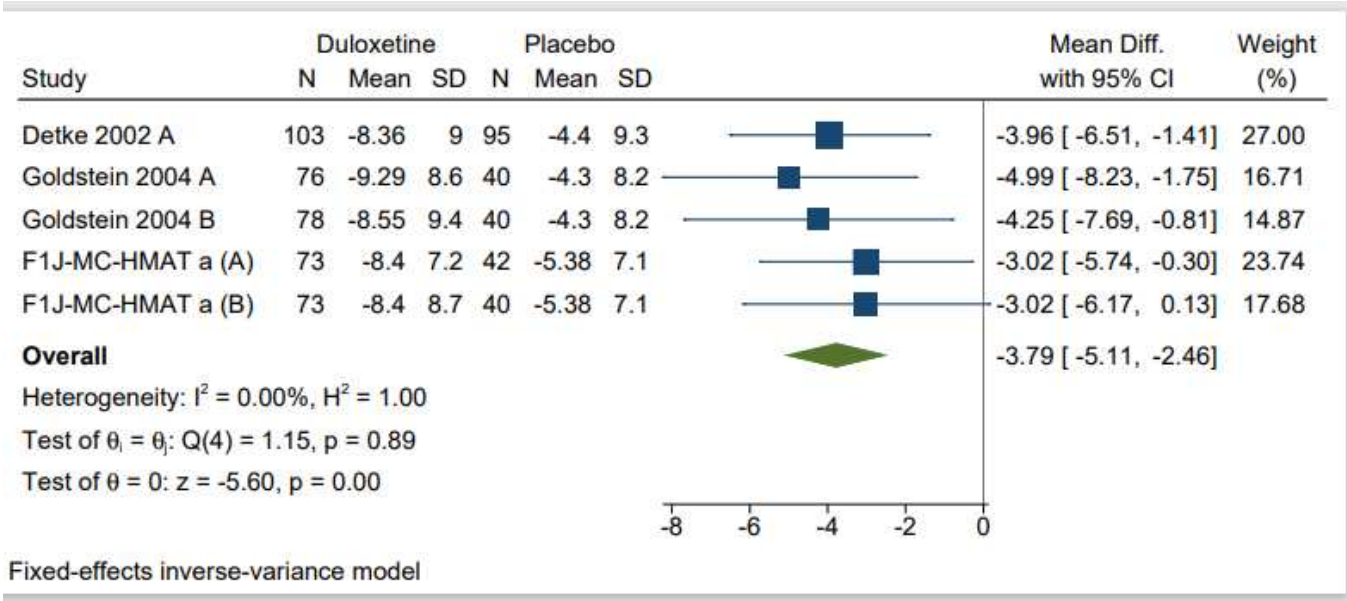

Supplementary Fig S20: Meta-analysis of duloxetine vs. placebo on the outcome quality of life.

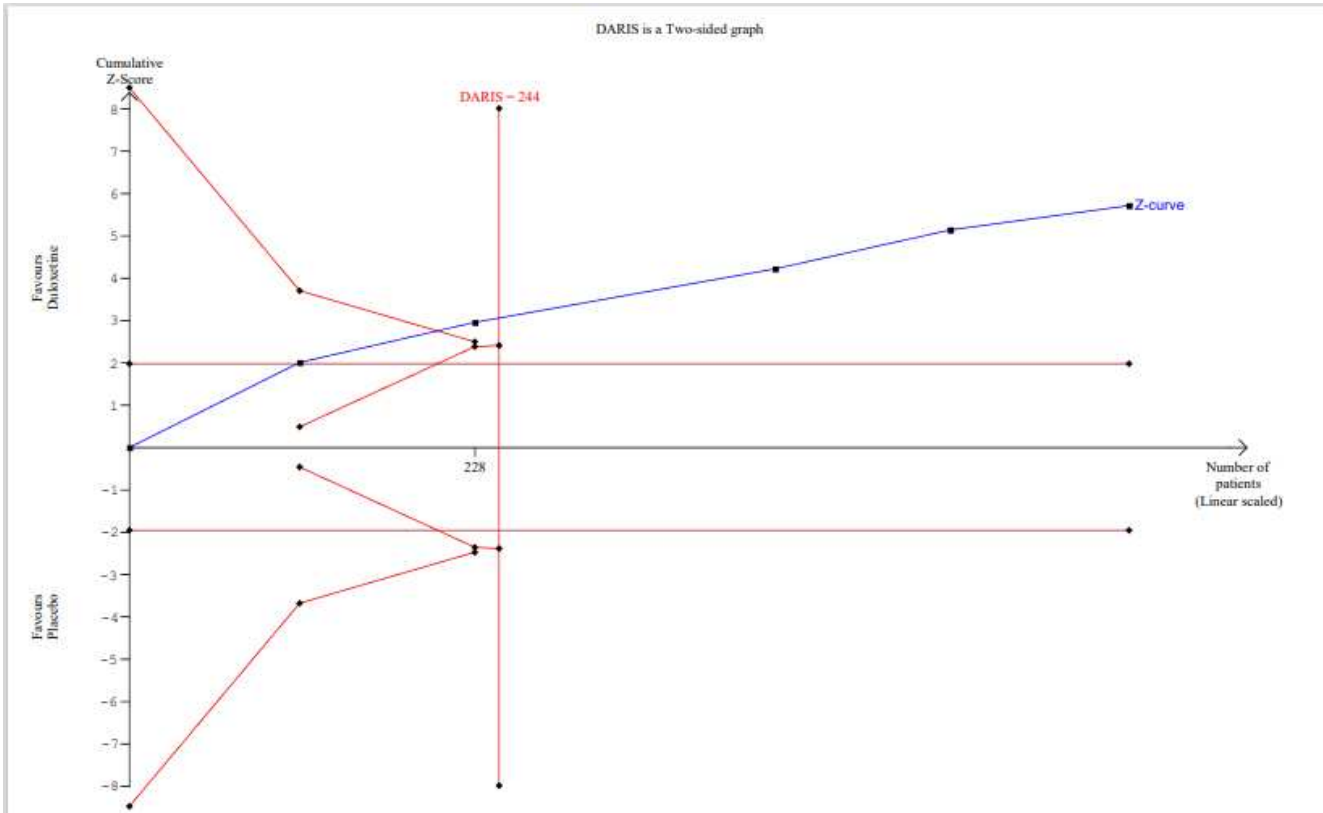

Supplementary Fig S21: Trial Sequential Analysis of duloxetine vs. placebo for the outcome quality of life.

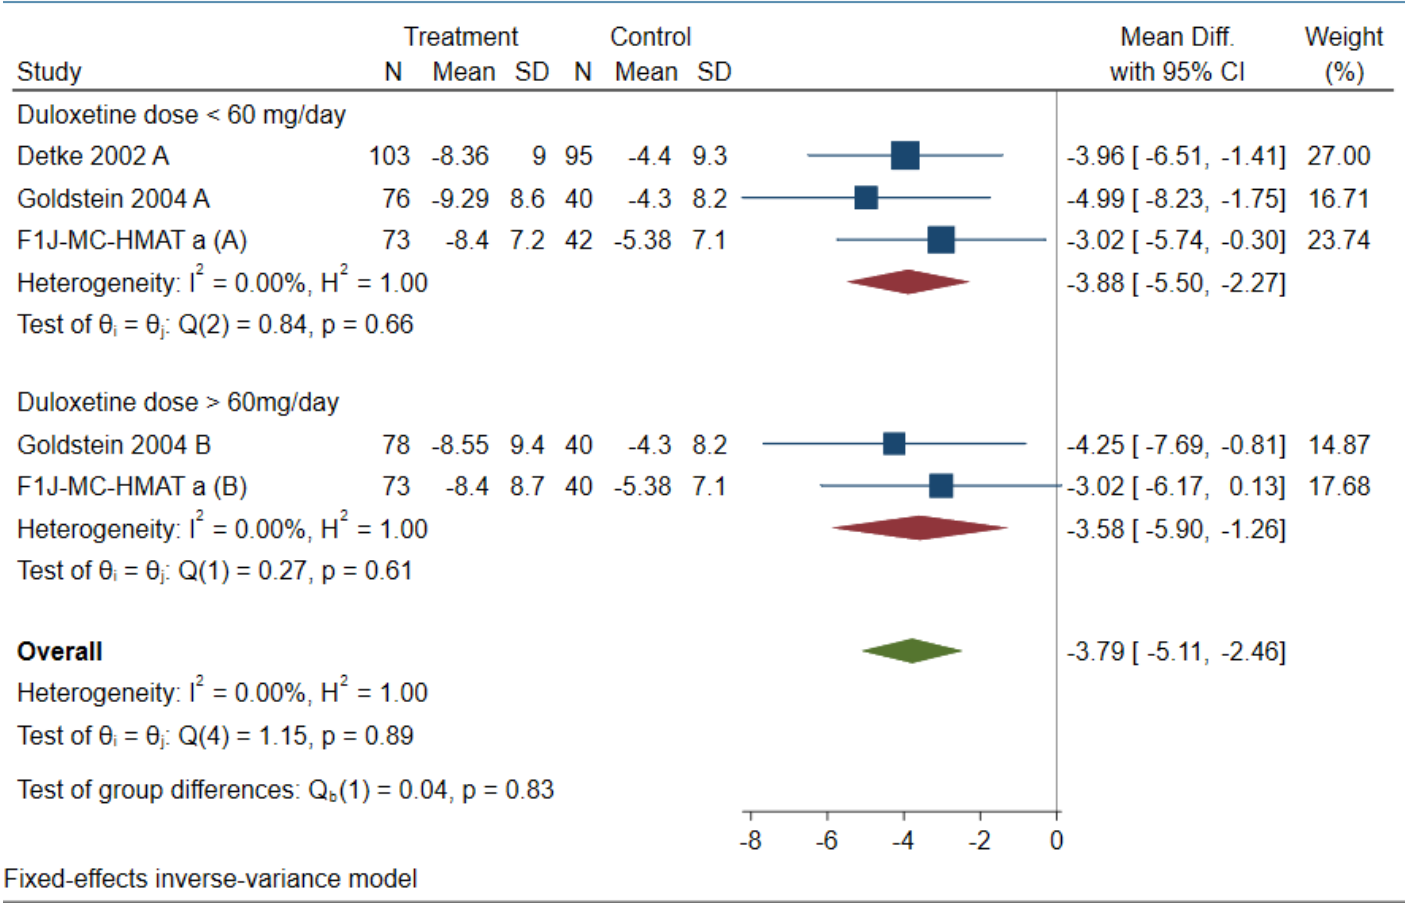

Supplementary Fig S22: Subgroup analysis of duloxetine dose on quality of life.



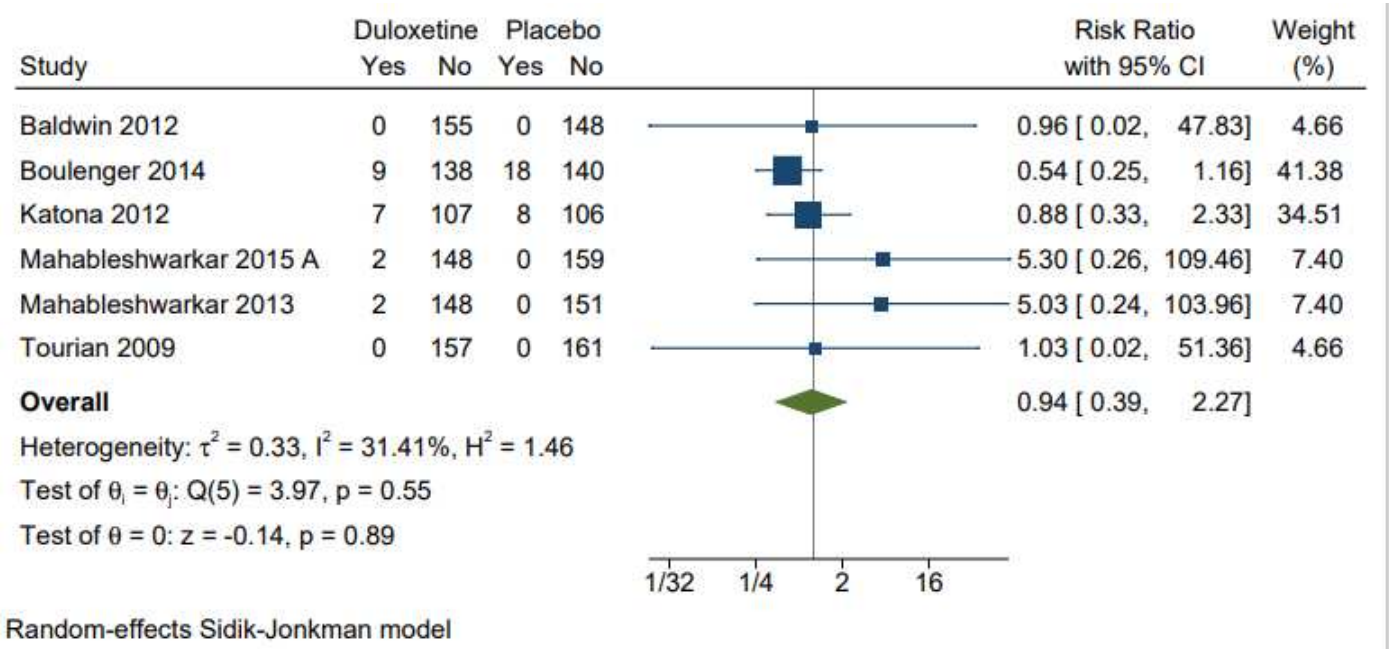

Supplementary Fig S23: Meta-analysis of duloxetine vs. placebo on the outcome suicidal ideation.

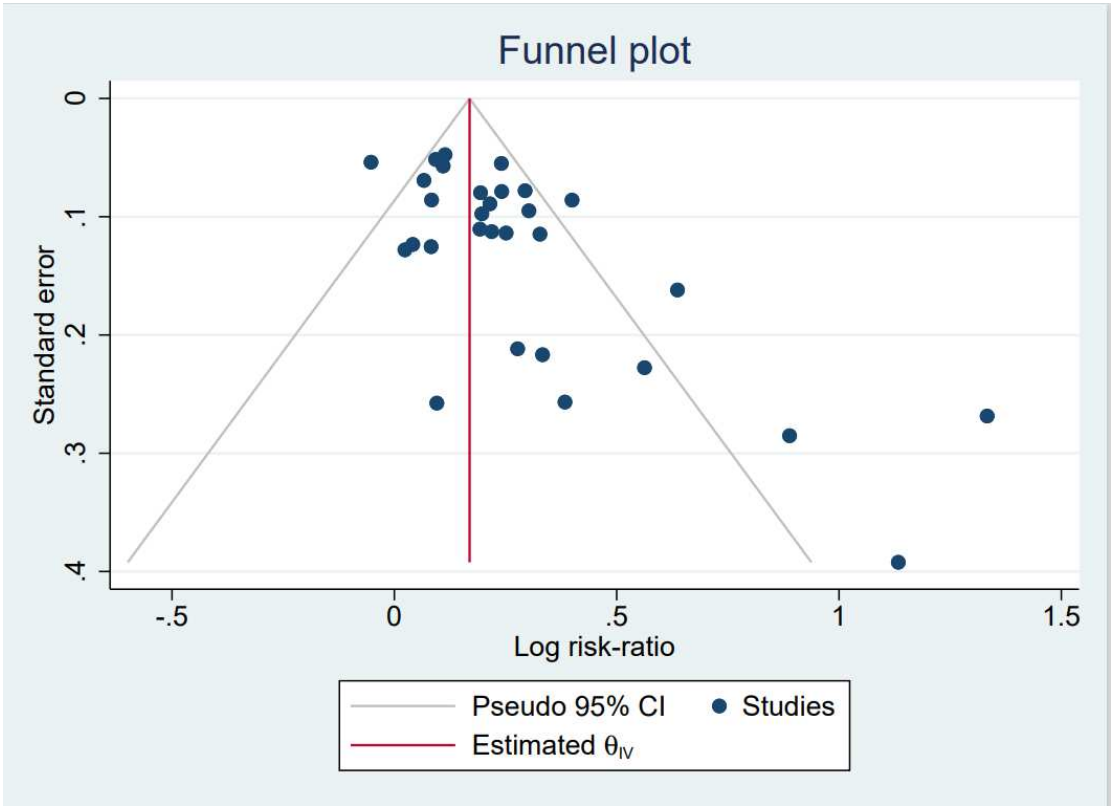

Supplementary Fig S24: Funnel plot duloxetine vs. placebo for the outcome non-serious adverse events.

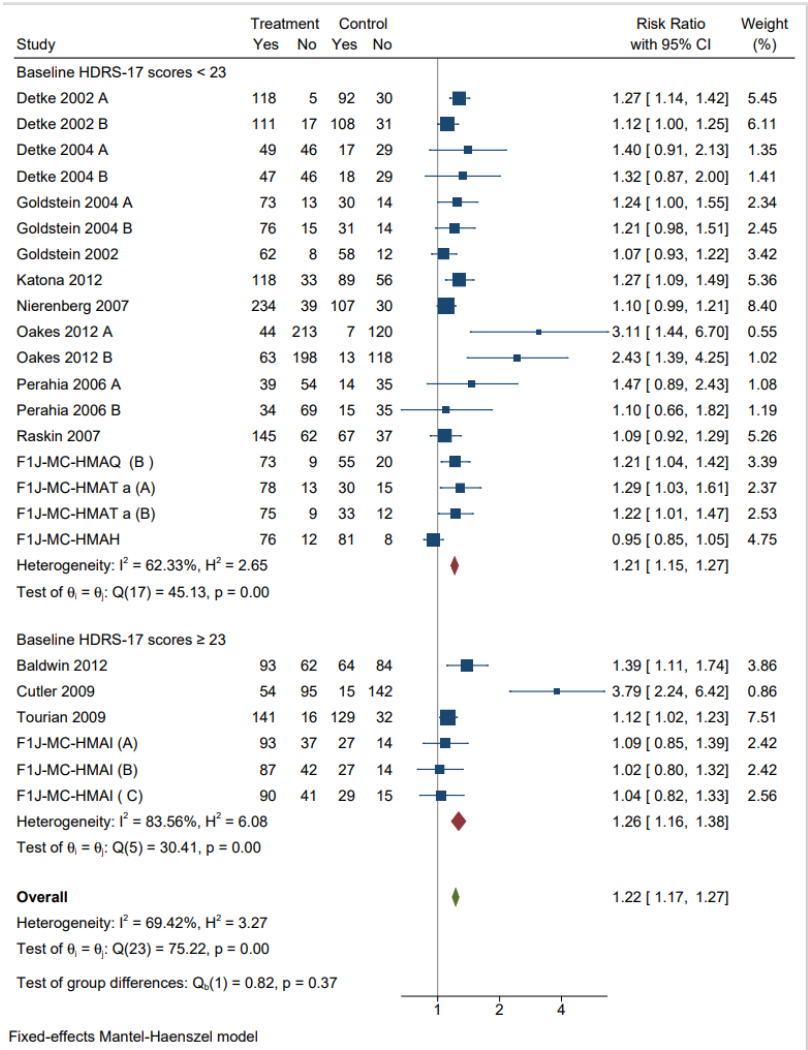

Supplementary Fig S25: Subgroup analysis of baseline HDRS scores on non-serious adverse events.

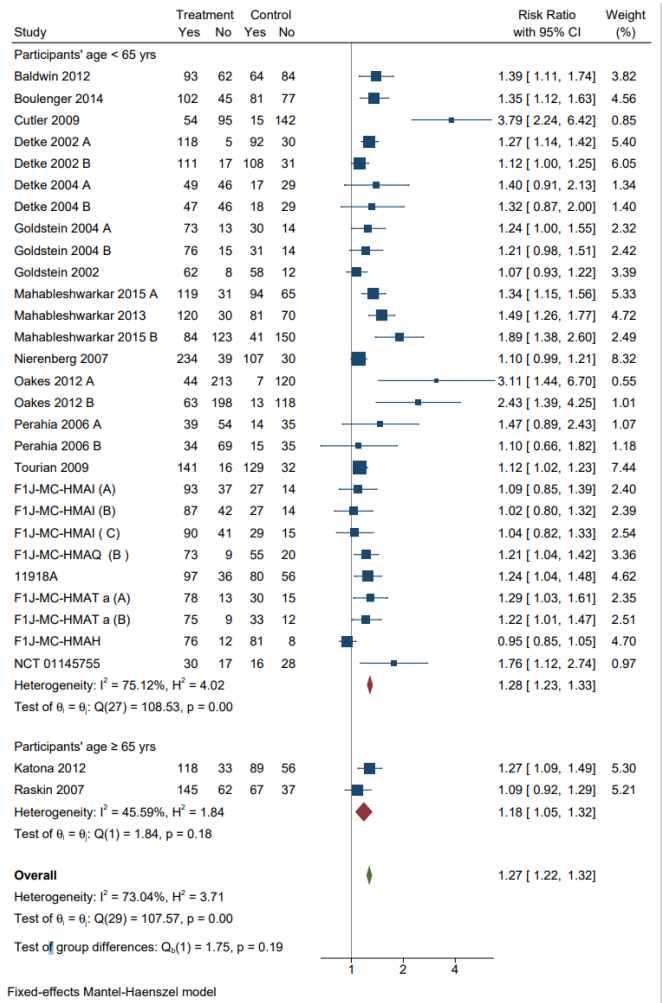

Supplementary Fig S26: Subgroup analysis of participants' age on non-serious adverse events.

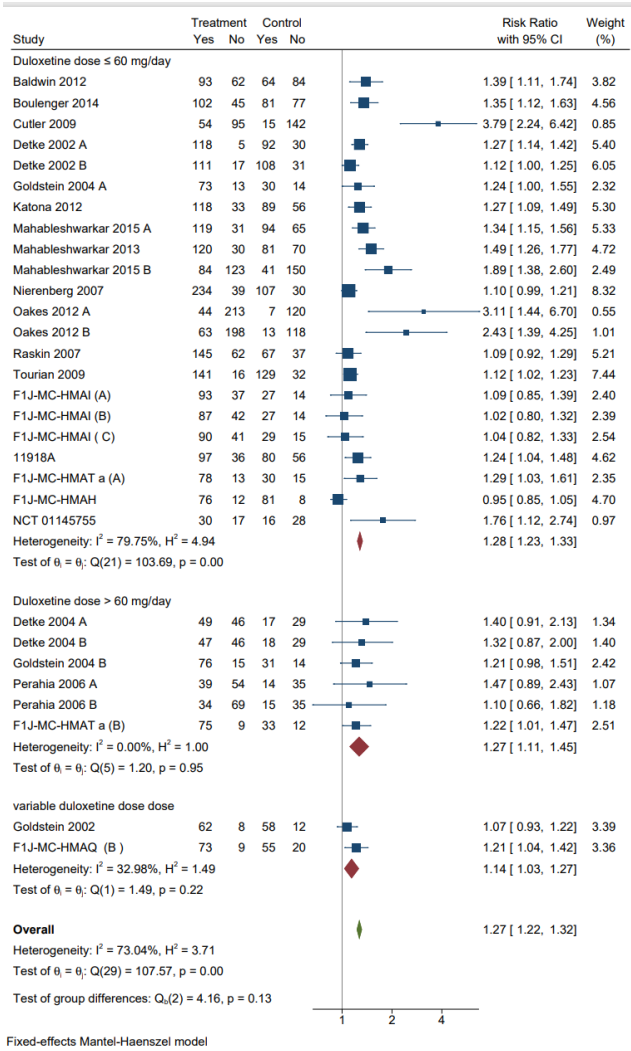

Supplementary Fig S27: Subgroup analysis of duloxetine dose on non-serious adverse events.

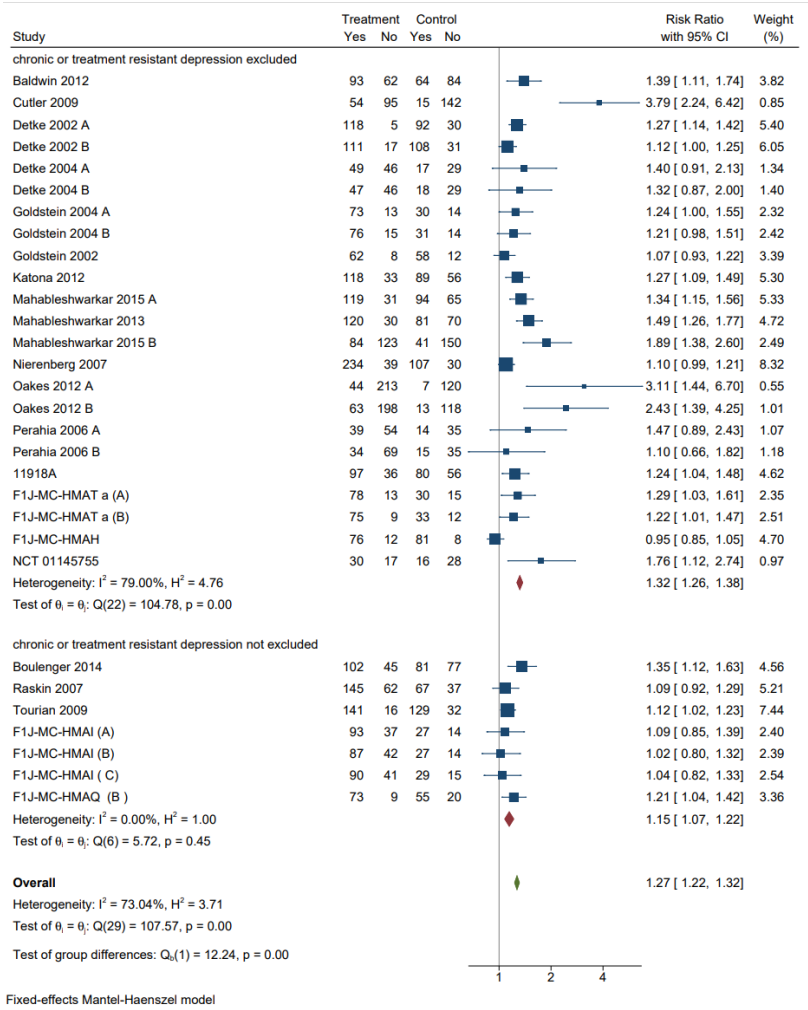

Supplementary Fig S28: Subgroup analysis of chronic treatment-resistant depression on non-serious adverse events.

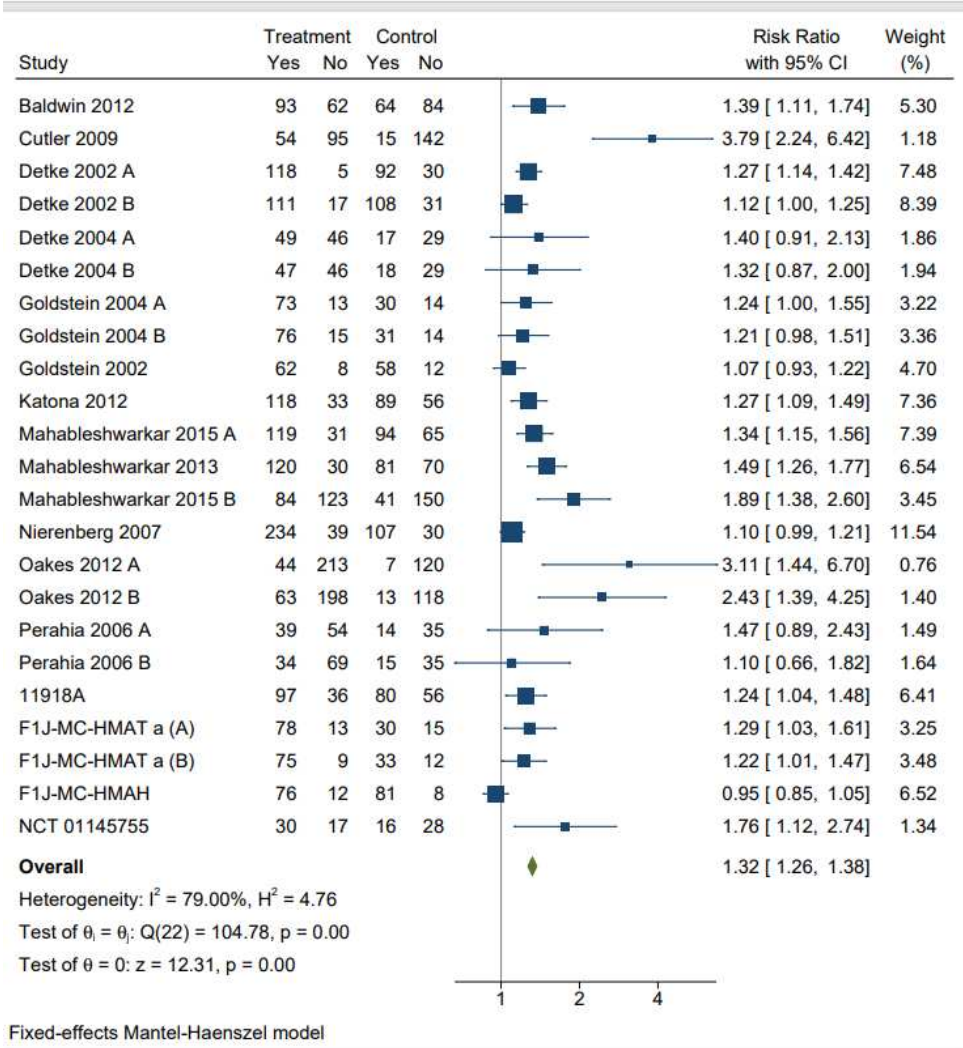

Supplementary Fig S29: Subgroup analysis of for participants without chronic treatment resistant depression on non-serious adverse events.

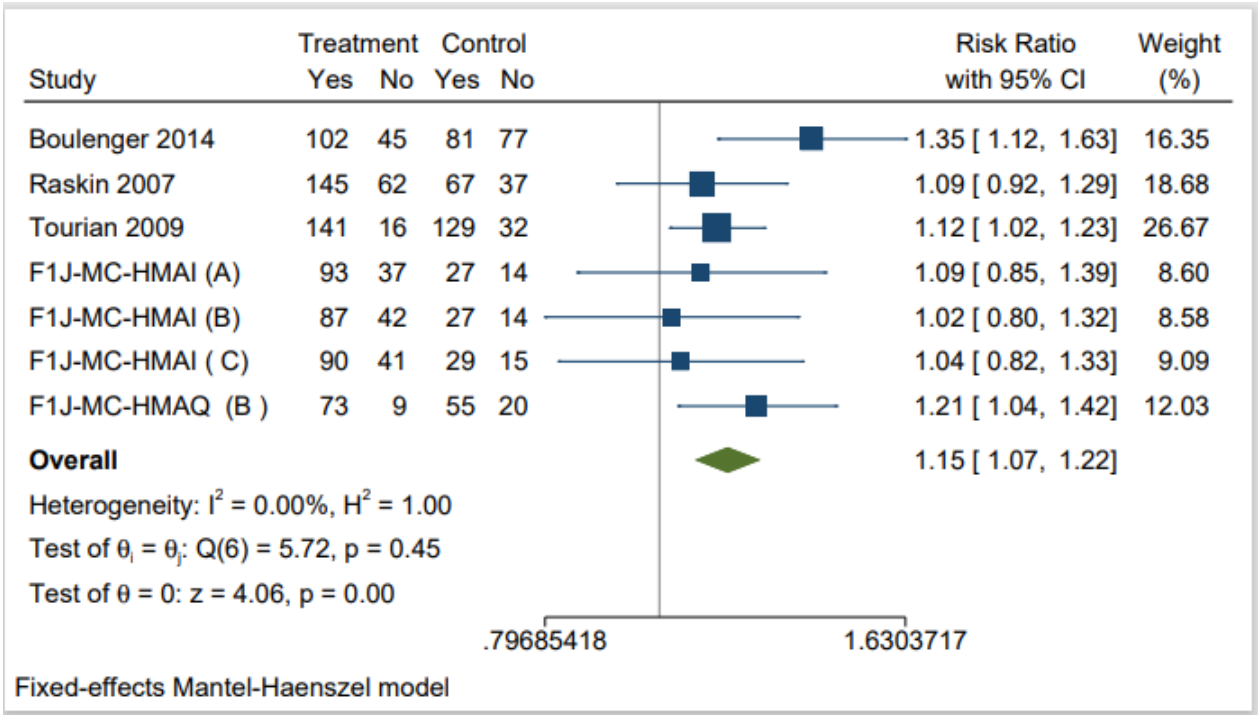

Supplementary Fig S30: Subgroup analysis of participants with chronic treatment resistant depression on non-serious adverse events.



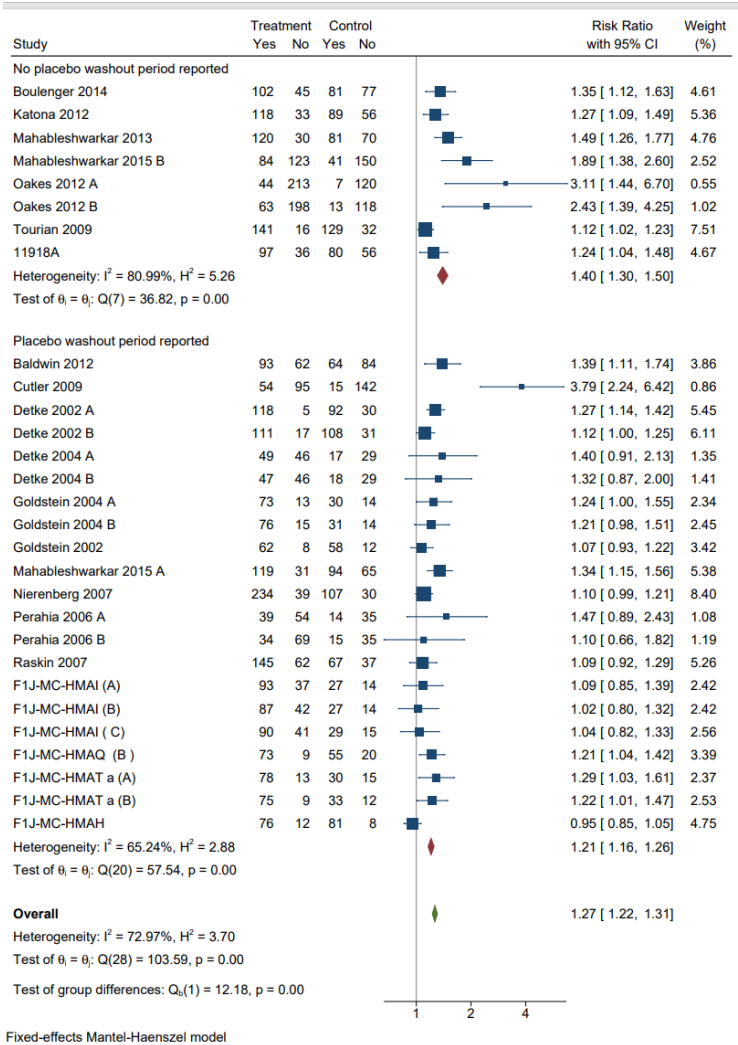

Supplementary Fig S31: Subgroup analysis of placebo washout period on non-serious adverse events.

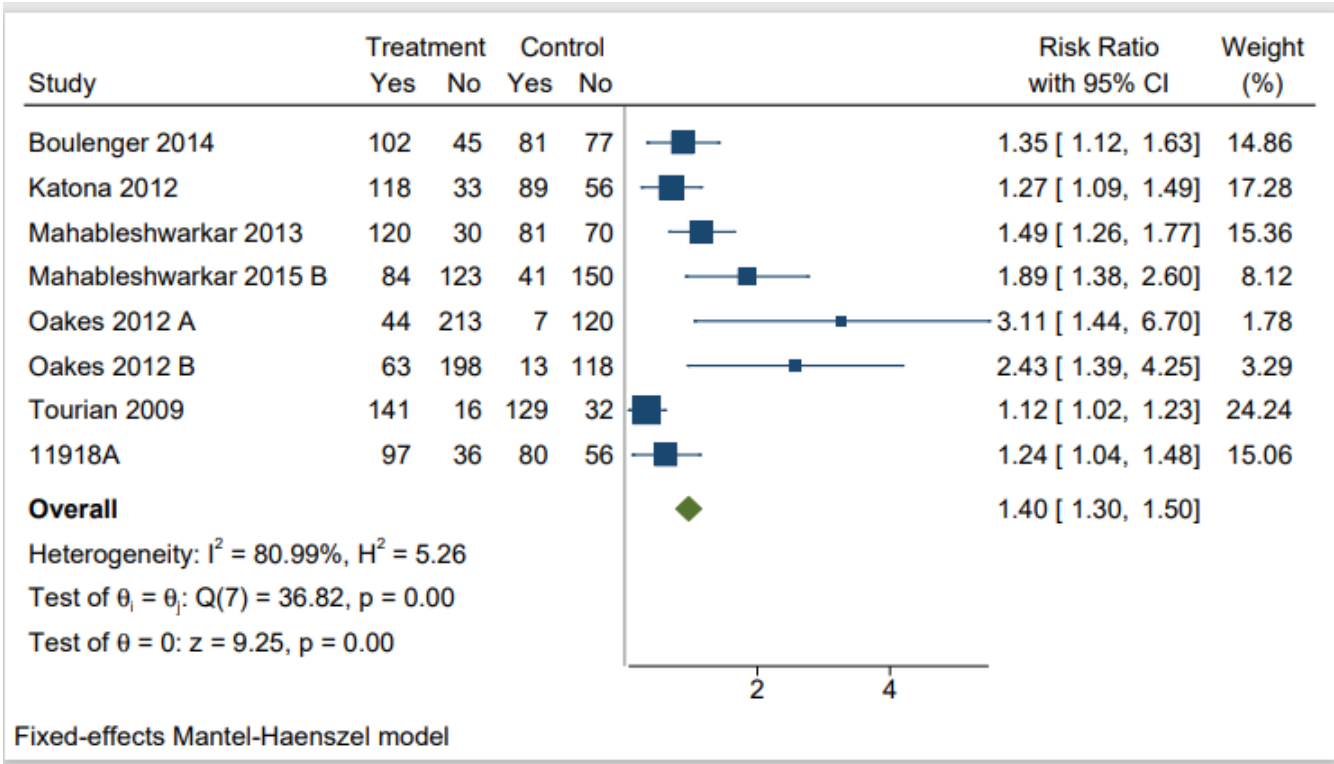

Supplementary Fig S32: Subgroup analysis of trials without placebo washout period on non-serious adverse events.

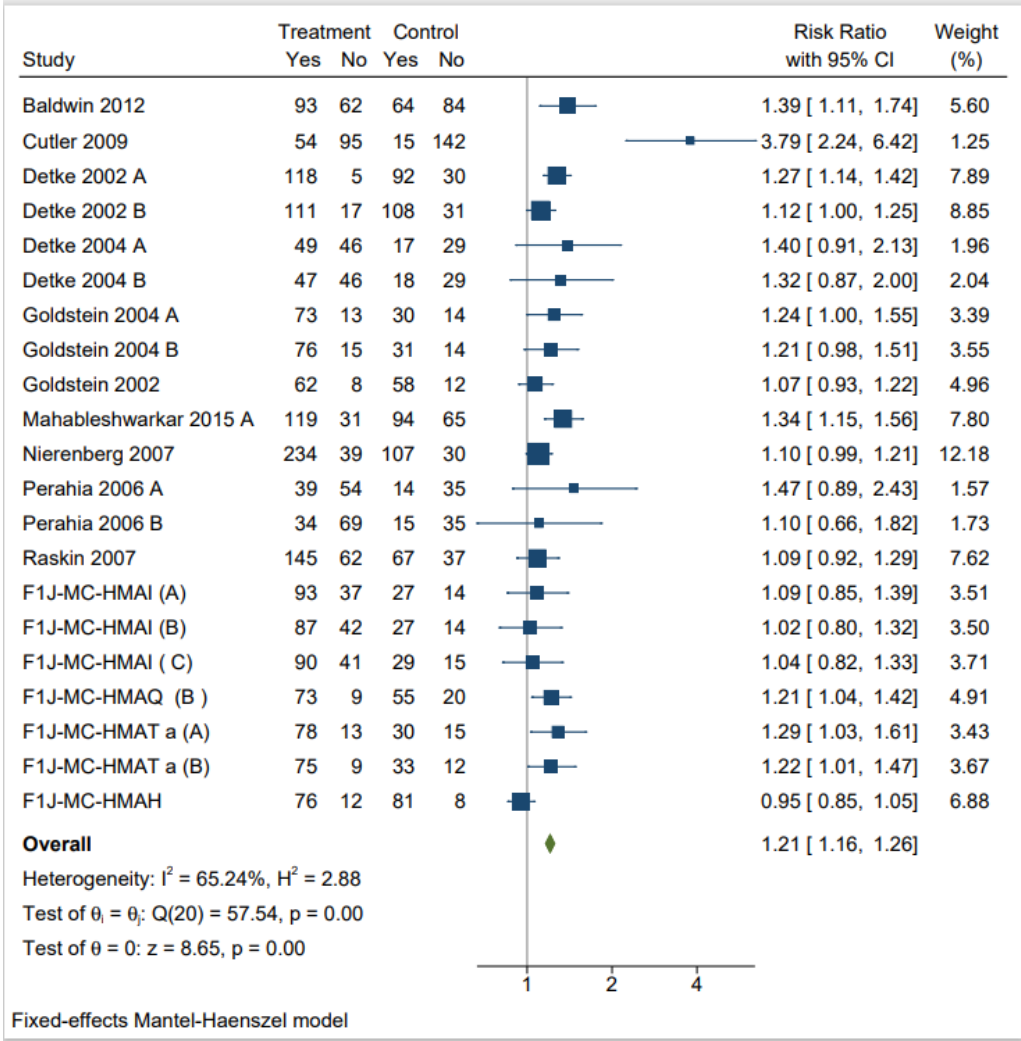

Supplementary Fig S33: Subgroup analysis of trials with placebo washout period on non-serious adverse events.

## Exploratory outcomes

Hamilton Depression Rating Scale, Montgomery-Asberg Depression Rating Scale and Beck's Depression Inventory

Twelve trials reported mean change/follow-up scores and SD for HDRS-17.<sup>1-12</sup> Only one trial reported mean change scores and corresponding SD for MADRS (NCT 01145755). However, we specified in the protocol that we will not pool change scores and end scores for standardized mean difference.

## Response

Thirteen trials reported response on HDRS-17 scale,<sup>1-13</sup> six trials on MADRS scale<sup>14-19</sup> and one trial on HDRS-24 scale.<sup>18</sup> Meta-analysis showed beneficial effect of duloxetine on response (RR 1.47, 95%CI, 1.37 to 1.57; P < 0.01; 21 trials) (Fig S34).

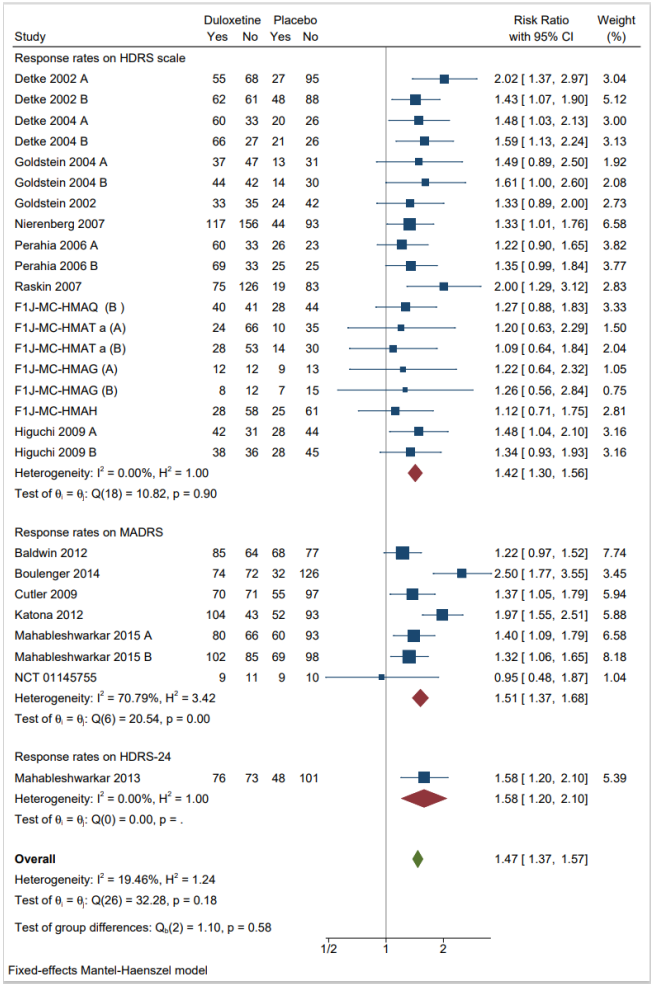

Supplementary Fig S34: Meta-analysis of duloxetine vs. placebo on the outcome response rates.

## Remission

Fourteen trials reported remission on HDRS-17 scale<sup>1-13</sup> and six trials on MADRS scale.<sup>14-19</sup> Meta-analysis of these 17 trials showed beneficial effect of duloxetine on remission (RR 1.49, 95%CI, 1.36 to 1.63;  $p < 0.01$ ; Fig S35).

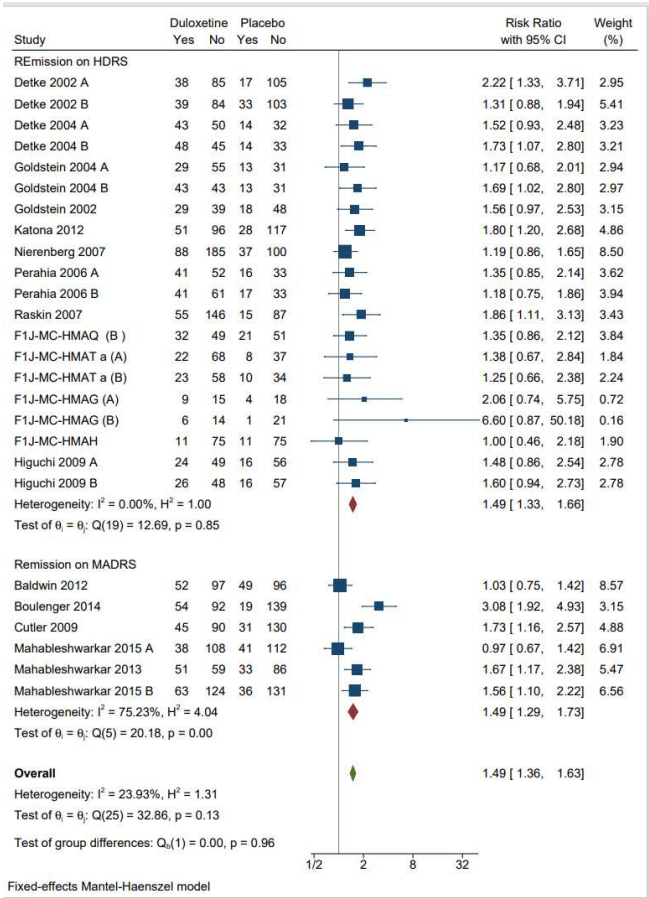

Supplementary Fig S35: Meta-analysis of duloxetine vs. placebo on the outcome remission rates.

## References

1. Detke MJ, Lu Y, Goldstein DJ, Hayes JR, Demitrack MA. Duloxetine, 60 mg once daily, for major depressive disorder: a randomized double-blind placebo-controlled trial. *The Journal of Clinical Psychiatry*. Apr 2002;63(4):308-15. doi:10.4088/jcp.v63n0407
2. Detke MJ, Lu Y, Goldstein DJ, McNamara RK, Demitrack MA. Duloxetine 60 mg once daily dosing versus placebo in the acute treatment of major depression. *Journal of Psychiatric Research*. Nov-Dec 2002;36(6):383-90. doi:10.1016/s0022-3956(02)00060-2
3. Detke MJ, Wiltse CG, Mallinckrodt CH, McNamara RK, Demitrack MA, Bitter I. Duloxetine in the acute and long-term treatment of major depressive disorder: a placebo- and paroxetine-controlled trial. *European Neuropsychopharmacology*. 2004/12/01/ 2004;14(6):457-470. doi:<https://doi.org/10.1016/j.euroneuro.2004.01.002>
4. Goldstein DJ, Lu Y, Detke MJ, Wiltse C, Mallinckrodt C, Demitrack MA. Duloxetine in the treatment of depression: a double-blind placebo-controlled comparison with paroxetine. *Journal of Clinical Psychopharmacology*. Aug 2004;24(4):389-99. doi:10.1097/01.jcp.0000132448.65972.d9
5. Goldstein DJ, Mallinckrodt C, Lu Y, Demitrack MA. Duloxetine in the treatment of major depressive disorder: a double-blind clinical trial. *The Journal of clinical psychiatry*. 2002/03// 2002;63(3):225-231. doi:10.4088/jcp.v63n0309
6. Perahia DGS, Wang F, Mallinckrodt CH, Walker DJ, Detke MJ. Duloxetine in the treatment of major depressive disorder: a placebo- and paroxetine-controlled trial. *European Psychiatry*. 2006;21(6):367-378. doi:10.1016/j.eurpsy.2006.03.004
7. Company ELA. *A double-blind, Placebo- and Clomipramine-controlled Study of Duloxetine in Patients with MAJOR Depression ( FIJ-MC-HMAI)*. 2001. *Abbreviated Clinical Study Report*.
8. Company ELA. *Duloxetine versus Placebo in the Treatment of Major Depression (FIJ-MC-HMAQ(B ))*. 2001. *Clinical Study Report*.
9. Company ELA. *Duloxetine Versus Placebo and Paroxetine in the Acute Treatment of Major Depression (FIJ-MC-HMAT)*. 2001. *Clinical Study Report*.
10. Company ELA. *Duloxetine/placebo in Major Depression (FIJ-MC-HMAG)*. 1996.
11. Company ELA. *Duloxetine 20/30 mg vs. Placebo in Major Depression (FIJ-MC-HMAH)*. 1996. *Clinical Study Report*.
12. Higuchi T MM, Kamijima K. Clinical evaluation of duloxetine in the treatment of major depressive disorder placebo and paroxetine controlled double-blind comparative study. *Japanese Journal of Clinical Psychopharmacology*. 2009;12:1613-34.
13. Raskin J, Wiltse CG, Siegal A, et al. Efficacy of Duloxetine on Cognition, Depression, and Pain in Elderly Patients With Major Depressive Disorder: An 8-Week, Double-Blind, Placebo-Controlled Trial. *American Journal of Psychiatry*. 2007/06/01 2007;164(6):900-909. doi:10.1176/ajp.2007.164.6.900
14. Baldwin DS, Loft H, Dragheim M. A randomised, double-blind, placebo controlled, duloxetine-referenced, fixed-dose study of three dosages of Lu AA21004 in acute treatment of major depressive disorder (MDD). *European Neuropsychopharmacology : the Journal of the European College of Neuropsychopharmacology*. Jul 2012;22(7):482-91. doi:10.1016/j.euroneuro.2011.11.008
15. Boulenger JP, Loft H, Olsen CK. Efficacy and safety of vortioxetine (Lu AA21004), 15 and 20 mg/day: a randomized, double-blind, placebo-controlled, duloxetine-referenced study in the acute treatment of adult patients with major depressive disorder. *International clinical psychopharmacology*. May 2014;29(3):138-49. doi:10.1097/yic.0000000000000018



16. Cutler AJ, Montgomery SA, Feifel D, Lazarus A, Aström M, Brecher M. Extended release quetiapine fumarate monotherapy in major depressive disorder: a placebo- and duloxetine-controlled study. *The Journal of Clinical Psychiatry*. Apr 2009;70(4):526-39. doi:10.4088/jcp.08m04592
17. Katona C, Hansen T, Olsen CK. A randomized, double-blind, placebo-controlled, duloxetine-referenced, fixed-dose study comparing the efficacy and safety of Lu AA21004 in elderly patients with major depressive disorder. *International Clinical Psychopharmacology*. Jul 2012;27(4):215-23. doi:10.1097/YIC.0b013e3283542457
18. Mahableshwarkar AR, Jacobsen PL, Chen Y, Serenko M, Trivedi MH. A randomized, double-blind, duloxetine-referenced study comparing efficacy and tolerability of 2 fixed doses of vortioxetine in the acute treatment of adults with MDD. *Psychopharmacology*. 2015/06/01 2015;232(12):2061-2070. doi:10.1007/s00213-014-3839-0
19. Mahableshwarkar AR, Zajecka J, Jacobson W, Chen Y, Keefe RS. A Randomized, Placebo-Controlled, Active-Reference, Double-Blind, Flexible-Dose Study of the Efficacy of Vortioxetine on Cognitive Function in Major Depressive Disorder. *Neuropsychopharmacology : official publication of the American College of Neuropsychopharmacology*. Jul 2015;40(8):2025-37. doi:10.1038/npp.2015.52
